# Supplementary material for: Mechanistic insight into ruthenium catalysed meta-sulfonation of 2-phenylpyridine
Source: Royal Society of Chemistry journal article supplement (doi:10.1039/c6cy01254j), 2016-01-01
Supplement: c6cy01254j1.pdf [file c6cy01254j1.pdf]

## Mechanistic Insight into Ruthenium-Catalysed *Meta*-Sulfonation of 2-Phenylpyridine

Patricia Marcé, Andrew J. Paterson, Mary F. Mahon, Christopher G. Frost\*

Department of Chemistry, University of Bath, Bath BA2 7AY, U.K.

### Supporting information

#### General Considerations

All chemicals used were reagent grade and used as supplied unless otherwise specified. HPLC grade acetonitrile (CH<sub>3</sub>CN), and diethyl ether were dried using a solvent purification system (PS-400-7®). <sup>1</sup>H and <sup>13</sup>C NMR spectra were recorded on Bruker, AV 300, AV 400 or AV 500 spectrometers in CD<sub>3</sub>CN as solvent. Chemical shifts (δ) were referenced internally to residual protic solvent signal for CD<sub>3</sub>CN (1.94 ppm <sup>1</sup>H (q), 1.39 ppm <sup>13</sup>C (sep)). 2D correlation spectra (gCOSY, gHSQC and gHMBC) were recorded to fully characterise the non-reported ruthenium complexes. Multiplicities are presented as: singlet (s), broad singlet (br s), doublet (d), apparent doublet (app d), doublet of doublets (dd), doublet of doublet of doublets (ddd), triplet (t), triplet of doublets (td), doublet doublet doublet of doublets (dddd), triplet of triplets (tt), quartet (q), quintet (quint.), and multiplet (m). Coupling constants (J) were expressed in Hertz (Hz).

ESI MS were run on an Agilent® 1200 Series LC/MSD. Elemental analysis (C, H, N, S) was run in London Metropolitan University. Analytical thin layer chromatography (TLC) was performed on Merck® silica gel 60 F254 glass or aluminium plates. Organic Compounds were visualized by UV (254 nm) irradiation. Flash column chromatography was carried out using forced flow or by gravity of the indicated solvent on Fluka® silica gel 60 (230-400 mesh) or on Acros® neutral aluminium oxide (50-200 μm, 60 Å).

All complexes were synthesised using standard Schlenck techniques under nitrogen atmosphere. The precursor catalyst [RuCl<sub>2</sub>(*p*-cymene)]<sub>2</sub> was purchased from Strem Chemicals and used without further purification. [RuCl(PhPy)(*p*-cymene)],<sup>1</sup> D<sup>5</sup>-2-phenylpyridine<sup>2</sup> and D<sup>3</sup>-2-phenylpyridine<sup>3</sup> were prepared according literature methods.

CCDC 1479685 contains the supplementary crystallographic data for this paper. These data can be obtained free of charge from The Cambridge Crystallographic Data Centre via [www.ccdc.cam.ac.uk/data\\_request/cif](http://www.ccdc.cam.ac.uk/data_request/cif).

## 1. Synthesis of Ru Complexes

### 1.1. Preparation of $[\text{Ru}(\text{PhPy})(p\text{-cymene})(\text{CH}_3\text{CN})]\text{PF}_6$ (**4**)

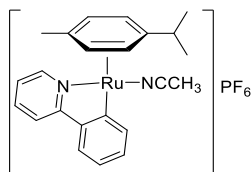

Dixneuf and Jutand method<sup>1c</sup> was used for the synthesis of **4** with modifications. **3** (0.5 g, 1.2 mmol) was dissolved in  $\text{CH}_3\text{CN}$  (12 mL) and  $\text{AgPF}_6$  (0.44 g, 1.7 mmol) was added. The reaction mixture was stirred for 30 min at room temperature. An aliquot from the reaction mixture was taken and diluted into  $\text{CD}_3\text{CN}$  and analysed by  $^1\text{H}$  NMR showing the complete consumption of the starting material. The reaction mixture was filtered over oven-dried neutral alumina and eluted with anhydrous  $\text{CH}_3\text{CN}$  under nitrogen. The solvent was removed under vacuum and the solution poured into petroleum ether. After filtration and drying, **4** was obtained as green solid (0.66 g, 98%). Spectroscopic data was in good agreement with those previously reported.<sup>1c</sup>

### 1.2. Preparation of $[\text{Ru}(\text{PhPy})(\text{CH}_3\text{CN})_4]\text{PF}_6$ (**5**)

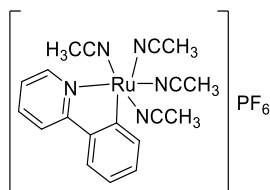

Dixneuf and Jutand method<sup>1c</sup> was used for the synthesis of **5** with modifications. **4** (0.5 g, 0.87 mmol) was dissolved in  $\text{CH}_3\text{CN}$  (5.4 mL). The reaction mixture was stirred for 2 days at 70 °C. An aliquot from the reaction mixture was taken and diluted into  $\text{CD}_3\text{CN}$  and analysed by  $^1\text{H}$  NMR showing the complete consumption of the starting material. The reaction mixture was purified by flash chromatography over oven-dried neutral alumina and eluted with anhydrous  $\text{CH}_3\text{CN}$  under nitrogen. The solution was concentrated under vacuum and the solution poured into petroleum ether. After filtration and drying, **5** was obtained as yellow-green solid (0.37 g, 75%). Spectroscopic data was in good agreement with those previously reported.<sup>1c</sup>

### 1.3. Preparation of $[\text{Ru}(\text{TsPhPy})(\text{CH}_3\text{CN})_4]\text{PF}_6$ (**7**)

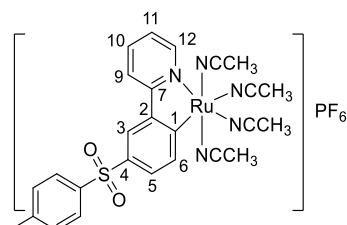

A dried Schlenck tube under argon was charged with molecular sieves 4 Å, complex **5** (0.1 g, 0.18 mmol) and dry  $\text{CH}_3\text{CN}$  (1.8 mL). Then, *p*-toluenesulfonyl chloride (TsCl) (67 mg, 0.35 mmol) and oven-dried  $\text{K}_2\text{CO}_3$  (61 mg, 0.44 mmol) were added. After stirring the reaction mixture for 15 h at 120 °C, the reaction crude was purified through oven-dried neutral alumina ( $\text{Al}_2\text{O}_3$ ) and eluted with  $\text{CH}_3\text{CN}$ . The

solution was concentrated under reduced pressure and precipitated with diethyl ether. After filtration and drying, complex **7** was obtained as green solid (66 mg, 52%). Crystals of **7** were grown by vapour diffusion using CH<sub>3</sub>CN–Et<sub>2</sub>O.

<sup>1</sup>H NMR (500 MHz, CD<sub>3</sub>CN) δ 8.92 (d, *J* = 5.5 Hz, 1H, H12), 8.22 (d, *J* = 8.0 Hz, 1H, H6), 8.14 (d, *J* = 1.8 Hz, 1H, H3), 8.04 (d, *J* = 8.1 Hz, 1H, H9), 7.88 (d, *J* = 8.3 Hz, 2H, Ts), 7.81 (td, *J* = 8.0, 1.5 Hz, 1H, H10), 7.49 (dd, *J* = 8.0, 1.9 Hz, 1H, H5), 7.37 (d, *J* = 8.2 Hz, 2H, Ts), 7.25 (t, *J* = 6.5 Hz, 1H, H11), 2.50 (s, 3H, CH<sub>3</sub>CN), 2.38 (s, 3H, Ts), 2.14 (s, 16H, CH<sub>3</sub>CN), 1.97 (s, 5H, CH<sub>3</sub>CN), 1.96 (s, 3H, CH<sub>3</sub>CN).

<sup>13</sup>C NMR (126 MHz, CD<sub>3</sub>CN) δ 201.76 (C1), 167.73 (C7), 153.96 (C12), 149.45 (C2), 145.40 (Ts), 141.64 (Ts), 140.55 (C6), 137.92 (C10), 135.27 (C4), 131.35 (Ts), 128.44 (Ts), 125.52 (C5), 123.74 (C11), 121.56 (C3), 120.02 (C9), 118.69 (s), 21.89 (Ts), 4.75 (CH<sub>3</sub>CN), 4.50 (CH<sub>3</sub>CN).

HRMS-ESI Calcd for C<sub>24</sub>H<sub>23</sub>N<sub>4</sub>O<sub>2</sub>RuS: 533.0585 [M-CH<sub>3</sub>CN]<sup>+</sup>. Found 533.0573.

Anal. Calcd for C<sub>26</sub>H<sub>26</sub>F<sub>6</sub>N<sub>5</sub>O<sub>2</sub>PRuS: C, 43.46; H, 3.65; N, 9.75; Found: C, 43.35; H, 3.75; N, 9.67.

#### 1.4. Preparation of 1H-benzo[d][1,2,3]triazol-1-yl 4-methylbenzenesulfonate (**8**)<sup>4</sup>

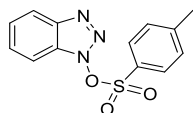

Synthesis of **8** was carried out using the reported method.<sup>4</sup> To a solution of 1-hydroxybenzotriazole hydrate (0.99 g, 7.4 mmol) in dry dichloromethane (30 mL), imidazole (0.51 g, 7.6 mmol) was added. The mixture was cooled to 0 °C under N<sub>2</sub> and a solution of TsCl (recrystallized) (1.43 g, 7.5 mmol) in dichloromethane (4 mL) was added dropwise over a 10 min period. The reaction mixture was warmed to rt and stirred for a further 3 h. The reaction mixture was diluted with dichloromethane (30 mL) and filtered in a sintered funnel over MgSO<sub>4</sub> under N<sub>2</sub>. The solvent was removed *in vacuo* and the resulting colourless residue was recrystallized from dry dichloromethane/hexane. The product was filtered to recover the pure final compound as a white crystalline solid (1.46 g, 69%).

<sup>1</sup>H NMR (300 MHz, CDCl<sub>3</sub>) δ 8.02 – 7.99 (m, 1H, Ar), 7.81 – 7.75 (m, 2H, Ar), 7.65 (dt, *J* = 8.3, 1.0 Hz, 1H, Ar), 7.62 – 7.55 (m, 1H, Ar), 7.47 – 7.38 (m, 3H, Ar), 2.50 (s, 3H, CH<sub>3</sub>).

<sup>13</sup>C NMR (75 MHz, CDCl<sub>3</sub>) δ 141.6 (q), 139.8 (q), 134.6 (q), 131.2, 129.8, 129.2 (2 x ArCH), 128.9 (q), 125.9 (2 x ArCH), 114.6, 112.5, 21.4 (CH<sub>3</sub>).

HRMS-ESI calculated for C<sub>13</sub>H<sub>11</sub>N<sub>3</sub>O<sub>3</sub>SNa: 312.0419 [M+Na]<sup>+</sup>. Found: 312.0399.

### 1.5. Preparation of 1-tosyl-1H-imidazole (**9**)<sup>5</sup>

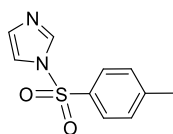

Synthesis of **9** was carried out with some modifications of the reported method.<sup>5</sup> A solution of imidazole (1.38 g, 20.3 mmol) in dry dichloromethane (10 mL) was stirred at 0 °C for 1.5 h under N<sub>2</sub>. In a separate flask, a solution of TsCl (recrystallised) (1.74 g, 9.1 mmol) in dry dichloromethane (10 mL) was stirred at rt for 1.5 h under N<sub>2</sub>. The *p*-toluenesulfonyl solution was added dropwise to the imidazole solution for 30 min at 0 °C. The reaction mixture was allowed to reach rt and stirred for a further 17 h. The resulting mixture was filtered through a pad of silica and washed with hexane (20 mL) followed by a mixture of EtOAc:hexane (1:1) (300 mL). The filtrate was concentrate *in vacuo* and the oil residue was dissolved in the minimum amount of EtOAc (1.5 mL) and crashed out with hexane (125 mL) to afford the pure compound as a white solid (1.39 g, 68%).

<sup>1</sup>H NMR (300 MHz, CDCl<sub>3</sub>) δ 8.01 (s, 1H, *NCHN*), 7.85 – 7.79 (m, 2H, Ar), 7.35 (d, *J* = 8.1 Hz, 1H, Ar), 7.29 (t, *J* = 1.4 Hz, 1H, SO<sub>2</sub>NCH), 7.08 (s, 1H, Ar), 2.44 (s, 3H, CH<sub>3</sub>).

<sup>13</sup>C NMR (75 MHz, CDCl<sub>3</sub>) δ 146.5 (q), 136.8, 135.1 (q), 131.6, 130.6, 127.5, 128.9 (q), 125.9, 114.6, 112.5, 21.4 (CH<sub>3</sub>).

HRMS-ESI calculated for C<sub>10</sub>H<sub>11</sub>N<sub>2</sub>O<sub>2</sub>S: 223.0541 [M+H]<sup>+</sup>. Found: 223.0535.

## 2. Study of the Ru(II) complexes involved in the *meta*-sulfonation reaction

### 2.1. Catalytic reactions

To a nitrogen-purged ampule, [RuCl<sub>2</sub>(*p*-cymene)]<sub>2</sub> (21 mg, 5 mol%), [RuCl(PhPy)(*p*-cymene)] (30 mg, 10 mol%) or [Ru(PhPy)(*p*-cymene)(CH<sub>3</sub>CN)]PF<sub>6</sub> (40 mg, 10 mol%) was dissolved in dry CH<sub>3</sub>CN (4 mL). Then, phenylpyridine (0.1 mL, 0.70 mmol), K<sub>2</sub>CO<sub>3</sub> (0.193 g, 1.4 mmol) and TsCl (0.4 g, 2.1 mmol) were added and the reaction mixture was heated at 120 °C in an oil bath for 15 h. The reaction crude was filtered over celite using EtOAc as eluent and the resulting mixture was purified by flash chromatography (from 20% EtOAc:hexane to 40% EtOAc) affording **2** as yellowish solid (0.11 g, 50%).

### 2.2. Study of the catalyst behaviour during the *meta*-sulfonation of 2-phenylpyridine

Following the reaction conditions detailed above, the reaction using [RuCl<sub>2</sub>(*p*-cymene)]<sub>2</sub>, [RuCl(PhPy)(*p*-cymene)] and [Ru(PhPy)(*p*-cymene)(CH<sub>3</sub>CN)]PF<sub>6</sub> were prepared in CD<sub>3</sub>CN and they were followed by <sup>1</sup>H-NMR taking samples at different times.

**Figure S1.**  $^1\text{H}$  NMR *meta*-sulfonation of phenylpyridine using  $[\text{RuCl}_2(p\text{-cymene})]_2$

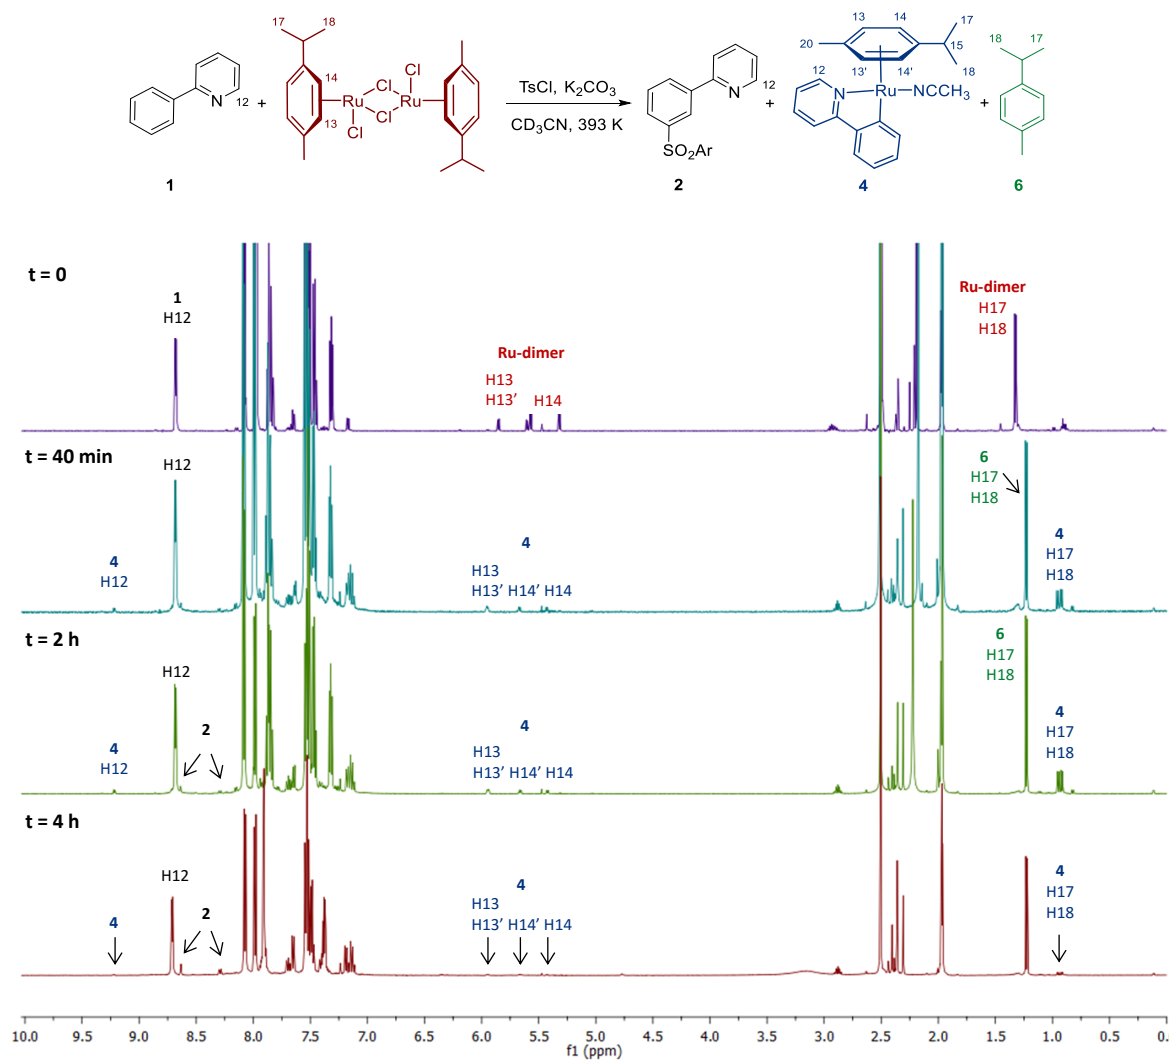

$^1\text{H}$  NMR (500 MHz,  $\text{CD}_3\text{CN}$ ) recorded at 298K

**Figure S2.**  $^1\text{H}$  NMR *meta*-sulfonation of phenylpyridine using [RuCl(PhPy)(*p*-cymene)]

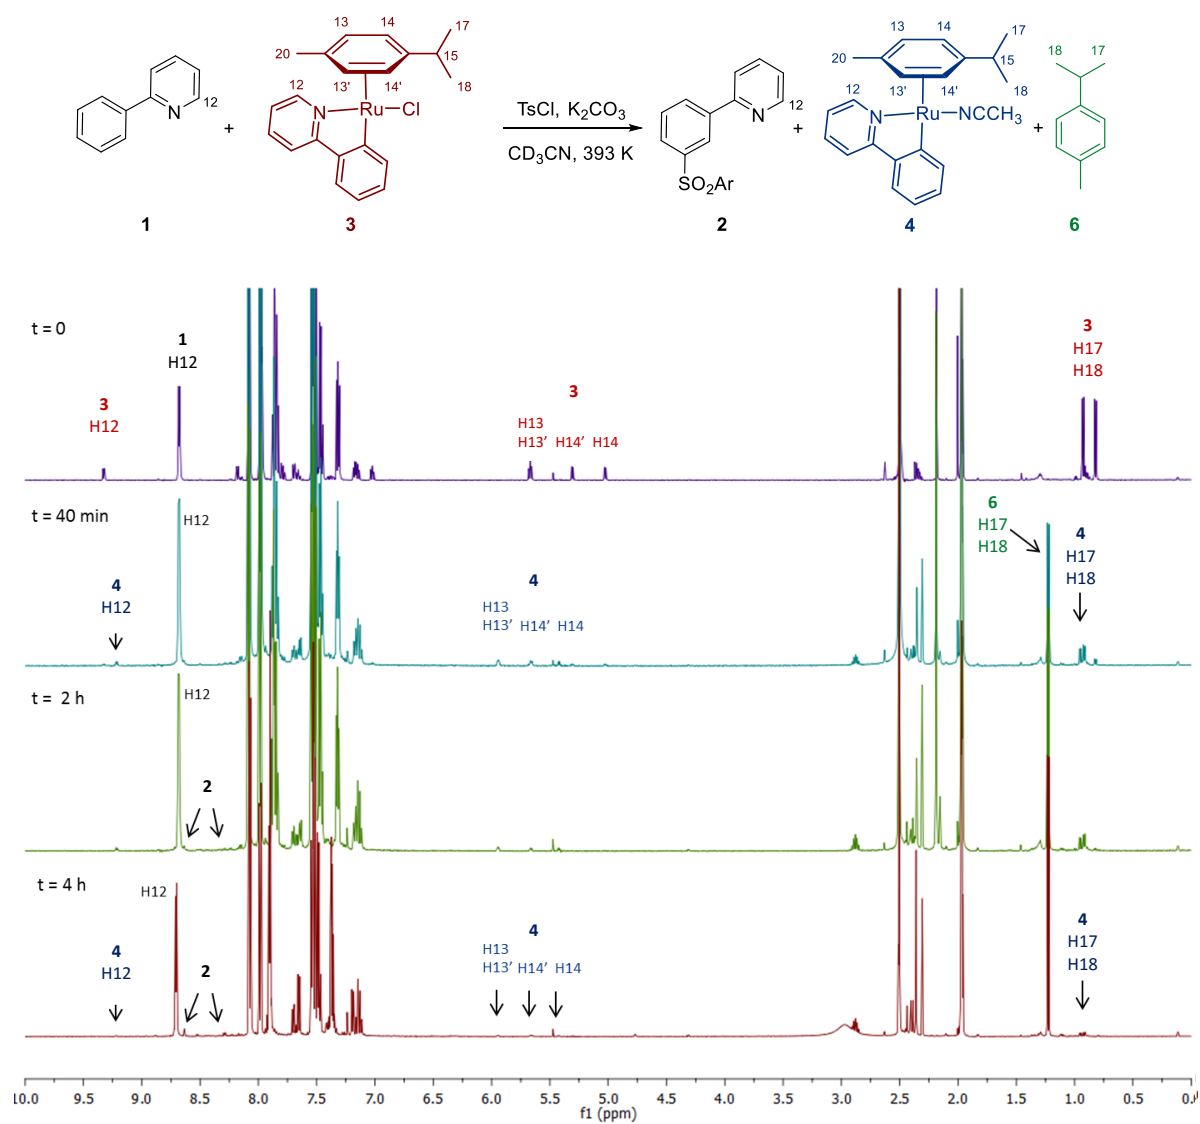

$^1\text{H}$  NMR (500 MHz,  $\text{CD}_3\text{CN}$ ) recorded at 298K

**Figure S3.**  $^1\text{H}$  NMR *meta*-sulfonation of phenylpyridine using  $[\text{Ru}(\text{PhPy})(p\text{-cymene})(\text{CH}_3\text{CN})]\text{PF}_6$

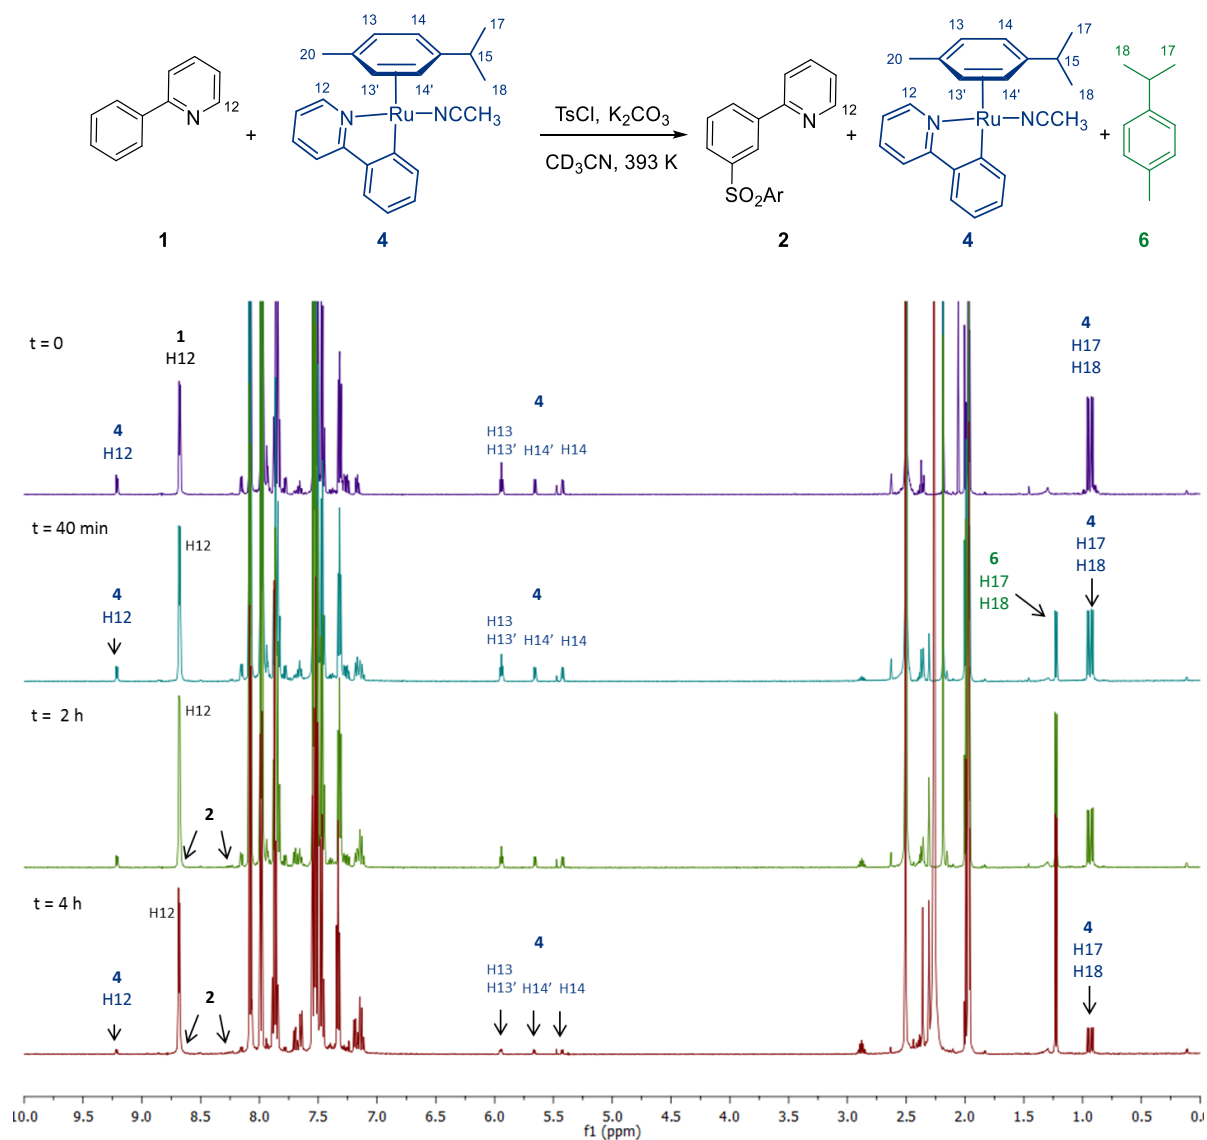

$^1\text{H}$  NMR (500 MHz,  $\text{CD}_3\text{CN}$ ) recorded at 298K

## 2.4. Reaction of [Ru(PhPy)(*p*-cymene)(CH<sub>3</sub>CN)]PF<sub>6</sub> with KCl

In a flame-dried NMR tube with a young cap, [Ru(PhPy)(*p*-cymene)(CH<sub>3</sub>CN)]PF<sub>6</sub> (10 mg, 0.017 mmol) was dissolved in CD<sub>3</sub>CN (0.5 mL) and KCl (20 mg, 0.27 mmol) was added. The NMR sample was heated for 15 h at 363 K.

**Figure S4.** Reaction of [RuPhPy(*p*-cymene)]PF<sub>6</sub> with KCl

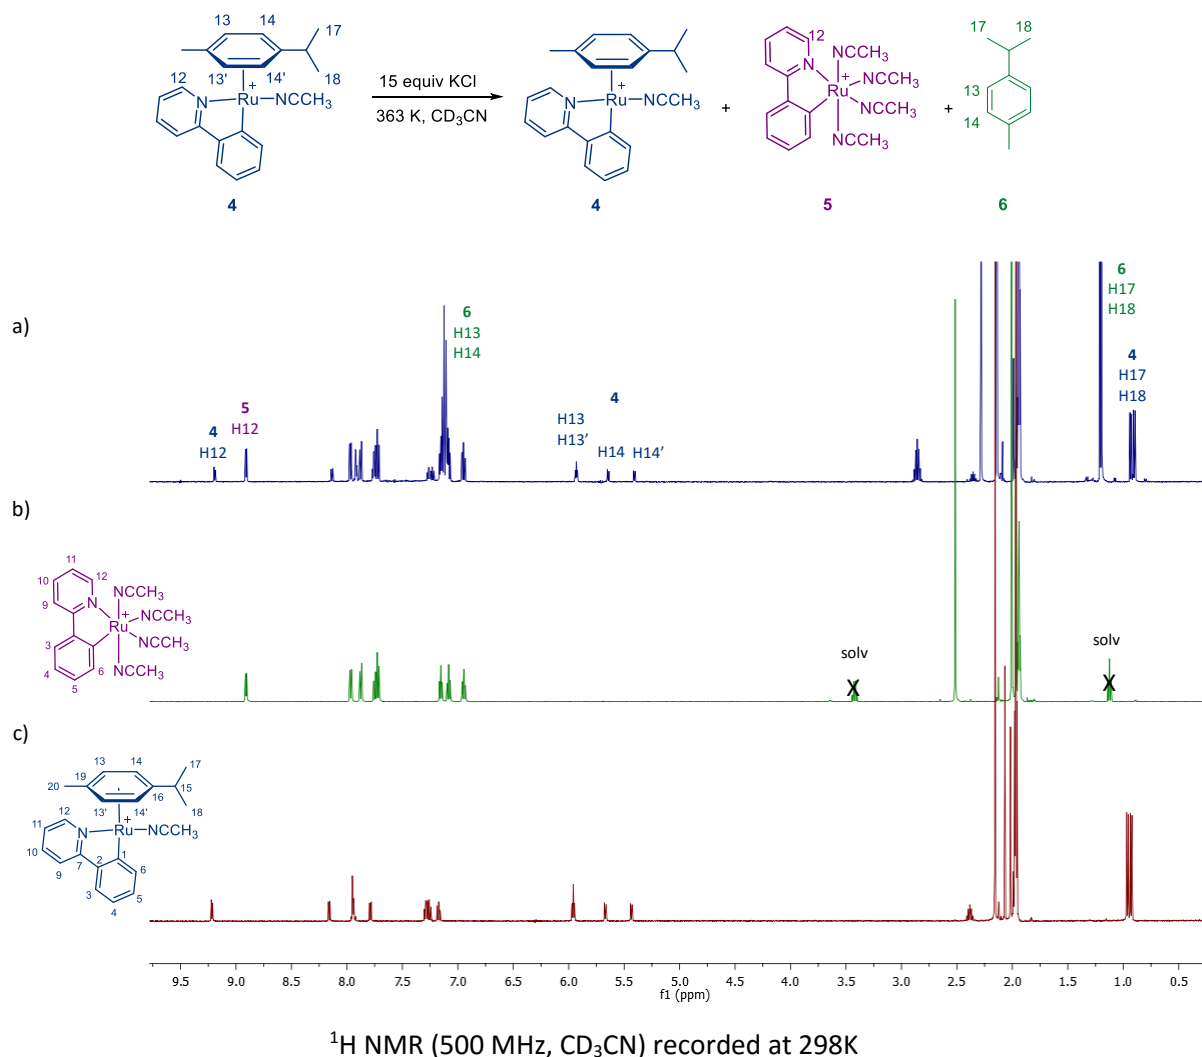

a) <sup>1</sup>H-NMR of the reaction mixture after heating **4** at 363 K; b) <sup>1</sup>H-NMR of **5** for comparison; c) <sup>1</sup>H-NMR of **4** for comparison.

## 2.5. Study of the stability of [RuCl(PhPy)(*p*-cymene)] in the presence of TsCl

In a flame-dried NMR tube with a young cap, [RuCl(PhPy)(*p*-cymene)] (34 mg, 0.08 mmol) was dissolved in CD<sub>3</sub>CN. The sample was placed in the NMR spectrometer which was previously heated at 343 K. <sup>1</sup>H-NMR were recorded overtime at this temperature. After 1 h TsCl (23 mg, 0.12 mmol) was added and heated at the same temperature in the NMR spectrometer recording several <sup>1</sup>H spectra overtime.



**Figure S5.** Stability of  $[\text{RuCl}(\text{PhPy})(p\text{-cymene})]$  in the presence of TsCl

a)  $[\text{RuCl}(\text{PhPy})(p\text{-cymene})]$  in  $\text{CD}_3\text{CN}$  heated at 343 K

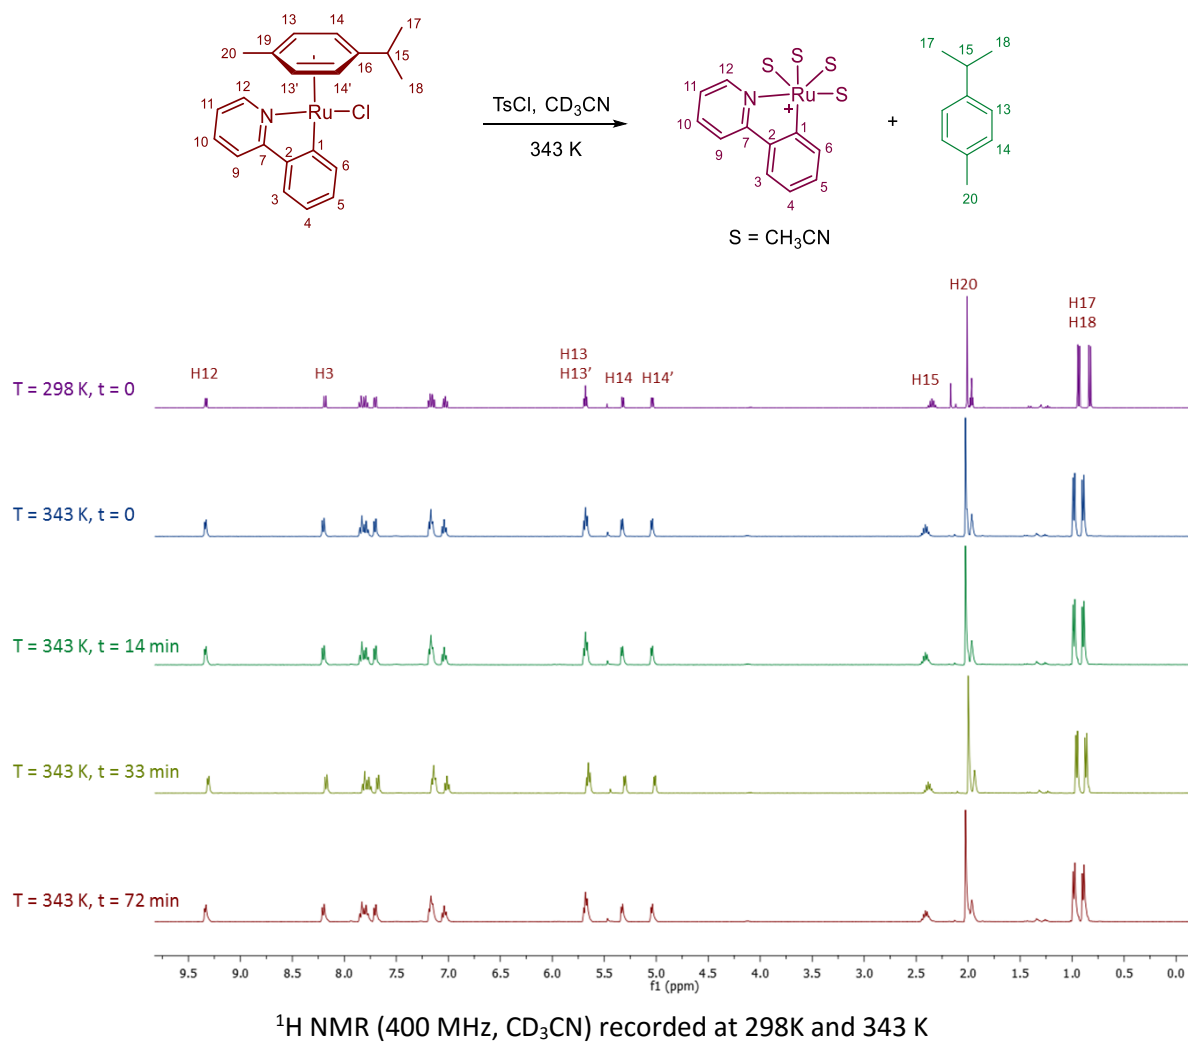

b)  $[\text{RuCl}(\text{PhPy})(p\text{-cymene})]$  in  $\text{CD}_3\text{CN}$  heated at 343 K in the presence of TsCl

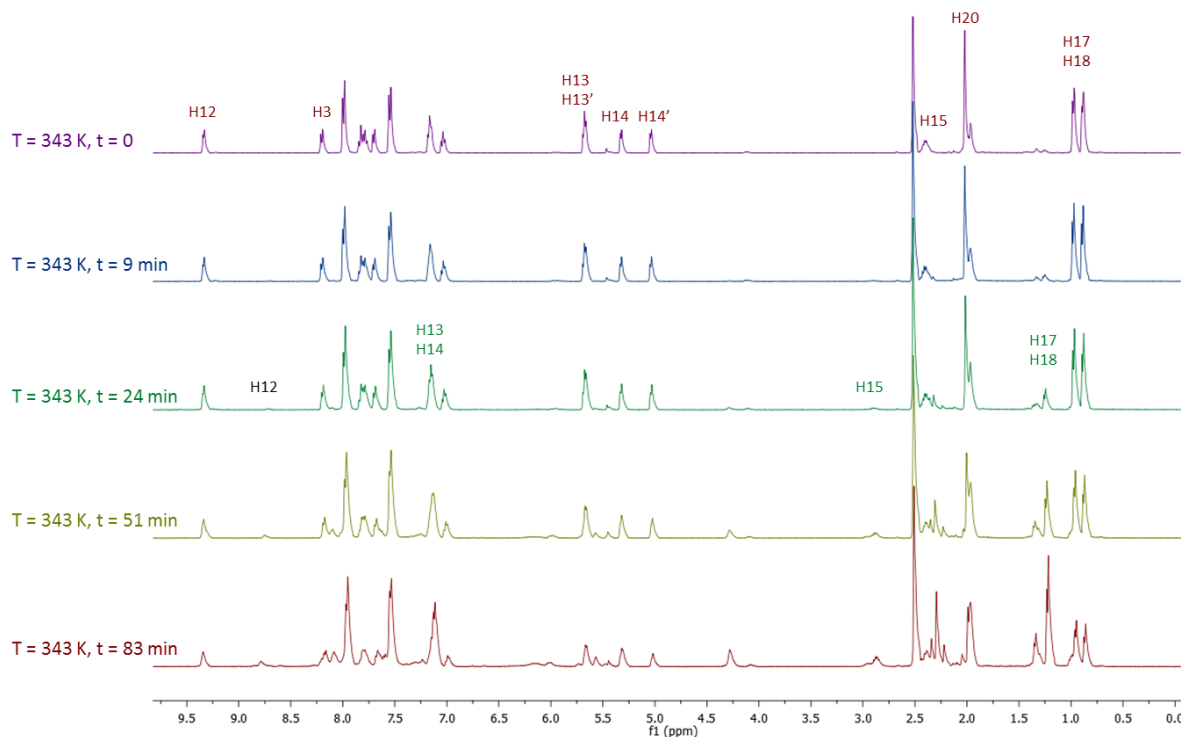

$^1\text{H}$  NMR (400 MHz,  $\text{CD}_3\text{CN}$ ) recorded at 343 K

### 3. Study of the protodemetalation step

#### 3.1. Protodemetalation of **7**

In a flame dried NMR tube with a young cap  $[\text{Ru}(\text{TsPhPy})(\text{CH}_3\text{CN})_4]\text{PF}_6$  (7 mg, 0.01 mmol) was dissolved in  $\text{CD}_3\text{CN}$  (0.5 mL) and  $\text{KHCO}_3$  (9.7 mg, 0.1 mmol),  $\text{MesCO}_2\text{H}$  (1.6 mg, 0.01 mmol) and  $\text{K}_2\text{CO}_3$  (2.7 mg, 0.02 mmol),  $\text{MesCO}_2\text{H}$  (2.4 mg, 0.015 mmol),  $\text{MesCO}_2\text{H}$  (16 mg, 0.1 mmol),  $p$ -toluenesulfonic acid ( $p$ -TSA) (18 mg, 0.094 mmol) or a mixture of PhPy (1.4 mL, 0.01 mmol) and  $\text{K}_2\text{CO}_3$  (2.7 mg, 0.02 mmol) were added depending on the experiment. The sample was heated for 15 h at 373 K in an oil bath.

**Table S1.** Protodemetalation conditions of **7**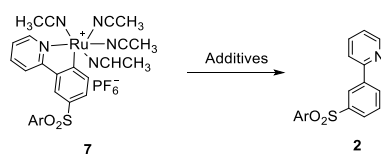

| Entry | Proton source                                                          | <b>2</b> (%)      |
|-------|------------------------------------------------------------------------|-------------------|
| 1     | 10 equiv KHCO <sub>3</sub>                                             | --                |
| 2     | 1 equiv MesCO <sub>2</sub> H<br>2 equiv K <sub>2</sub> CO <sub>3</sub> | --                |
| 3     | 1.5 equiv MesCO <sub>2</sub> H                                         | --                |
| 4     | 10 equiv MesCO <sub>2</sub> H                                          | --                |
| 5     | 1 equiv PhPy<br>2 equiv K <sub>2</sub> CO <sub>3</sub>                 | --                |
| 6     | 1.5 equiv <i>p</i> -TSA                                                | Complex <b>10</b> |
| 7     | 4.5 equiv TsCl<br>2 equiv K <sub>2</sub> CO <sub>3</sub>               | 23%               |
| 8     | 10 equiv PhPy<br>2 equiv K <sub>2</sub> CO <sub>3</sub>                | 26%               |

**Figure S6. Formation of complex 10**

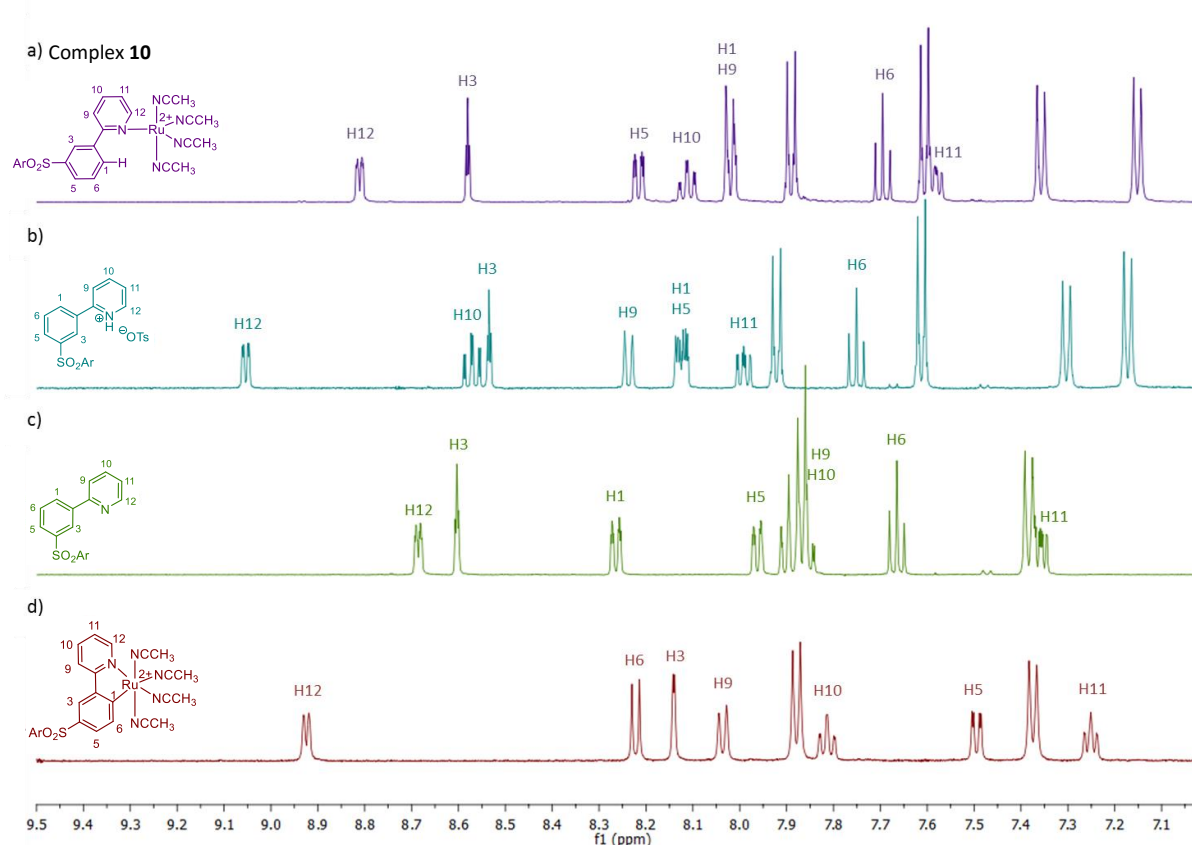

a)  $^1\text{H}$ -NMR for the compound obtained by treatment of **7** with *p*-TSA and assigned to complex **10**; b)  $^1\text{H}$ -NMR of the tosylated phenylpyridine salt in  $\text{CD}_3\text{CN}$  by its treatment with 1.5 equivalents of *p*-TSA; c)  $^1\text{H}$ -NMR of **2** for comparison; d)  $^1\text{H}$ -NMR of **7** for comparison.

### 3.2. Protodemetalation of **4**

In a flame dried NMR tube with a young cap  $[\text{Ru}(\text{PhPy})(p\text{-cymene})(\text{CH}_3\text{CN})]\text{PF}_6$  (7 mg, 0.01 mmol) was dissolved in  $\text{CD}_3\text{CN}$  (0.5 mL) and  $\text{K}_2\text{CO}_3$  (8 mg, 0.06 mmol),  $\text{KHCO}_3$  (12 mg, 0.12 mmol) or a mixture of PhPy (2.2  $\mu\text{L}$ , 0.015 mmol) and  $\text{K}_2\text{CO}_3$  (8 mg, 0.06 mmol) and PhPy (5.7  $\mu\text{L}$ , 0.04 mmol) and  $\text{K}_2\text{CO}_3$  (8 mg, 0.06 mmol) were added depending on the experiment. The sample was heated for 15 h at 393 K in an oil bath (Table S1).

**Table S2.** Protodemetalation conditions for **4**

| Entry | Proton source                                                              | <b>2</b> (%) |
|-------|----------------------------------------------------------------------------|--------------|
| 1     | 1.5 equiv TsCl<br>5 equiv K <sub>2</sub> CO <sub>3</sub>                   | 14           |
| 2     | 1.5 equiv TsCl<br>10 equiv KHCO <sub>3</sub>                               | 11           |
| 3     | 1.5 equiv TsCl<br>5 equiv K <sub>2</sub> CO <sub>3</sub><br>1.5 equiv PhPy | 33           |
| 4     | 1.5 equiv TsCl<br>5 equiv K <sub>2</sub> CO <sub>3</sub><br>3.5 equiv PhPy | 46           |

#### 4. Experiments with isotopically labelled compounds

##### 4.1. Synthesis of 2-(2,6-dideuterophenyl)pyridine

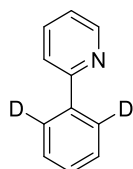

A suspension of [RuCl<sub>2</sub>(*p*-cymene)]<sub>2</sub> (76.5 mg, 0.124 mmol), AcOD (0.1 mL, 1.74 mmol), K<sub>2</sub>CO<sub>3</sub> (1.38 g, 10 mmol) and **1** (0.71 mL, 4.97 mmol) in degassed D<sub>2</sub>O (20 mL) was stirred under N<sub>2</sub> for 20 h at 100 °C. EtOAc (50 mL) and H<sub>2</sub>O (50 mL) were added to the reaction mixture at ambient temperature. The separated aqueous phase was extracted with EtOAc (2 × 50 mL). The combined organic layers were washed with brine (50 mL), dried over MgSO<sub>4</sub> and concentrated in vacuo. The remaining residue was purified by column chromatography on silica gel (hexane:EtOAc 5:1) and Kugelrohr-distillation to yield [**D**<sub>2</sub>]-**1** (56 mg, 72%) as a colourless oil.

##### 4.2. General procedure for the competitive experiments

To a nitrogen-purged ampule, [RuCl<sub>2</sub>(*p*-cymene)]<sub>2</sub> (11 mg, 5 mol%) was dissolved in dry CD<sub>3</sub>CN (4 mL). Then, phenylpyridine (50 μL, 0.35 mmol), [**D**<sub>5</sub>]-**1** (56 mg, 0.35 mmol), [**D**<sub>2</sub>]-**1** (51 mg, 0.35 mmol) or [**D**<sub>3</sub>]-**1** (55 mg, 0.35 mmol) along with K<sub>2</sub>CO<sub>3</sub> (97 mg, 0.7 mmol) and TsCl (0.2 g, 1 mmol) were added. The reaction mixture was heated at 120 °C in an oil bath. The reaction mixture was filtered through a pad of celite and the crude was purified by flash chromatography on silica gel (from 20% EtOAc:hexane to 40% EtOAc).

#### 4.2.1. Intramolecular competition experiment between 2-(2,3,4,5,6-pentadeuterophenyl)pyridine and phenylpyridine

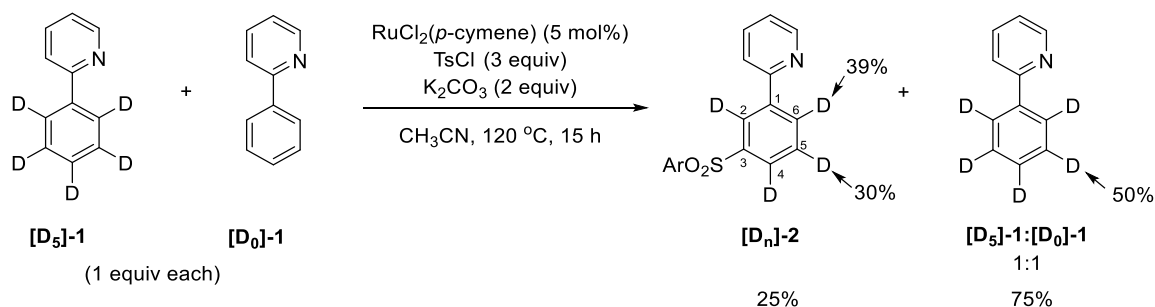

Following the general procedure described above, a mixture of **[D<sub>n</sub>]-2** ( $^1\text{H}$  NMR ratio H2/H6:D2/D6 1.6:1 and H5:D5 2.3:1, 54 mg, 25%) and a mixture of the re-isolated **[D<sub>0</sub>]-1** and **[D<sub>5</sub>]-1** ( $^1\text{H}$  NMR ratio 1:1, 83 mg, 75%) was obtained.

#### 4.2.2. Intramolecular competition experiment between 2-(2,6-dideuterophenyl)pyridine and phenylpyridine

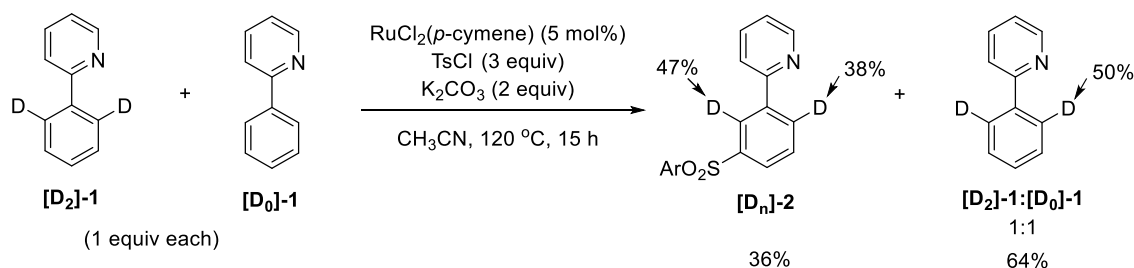

Following the general procedure described above, a mixture of **[D<sub>n</sub>]-2** ( $^1\text{H}$  NMR ratio H6:D6 1.6:1 and H2/D2 1.1:1, 78 mg, 36%) and a mixture of the re-isolated **[D<sub>0</sub>]-1** and **[D<sub>2</sub>]-1** ( $^1\text{H}$  NMR ratio 1:1, 67 mg, 64%) was obtained.

#### 4.2.3. Intramolecular competition experiment between 2-(3,4,5-trideuterophenyl)pyridine and phenylpyridine

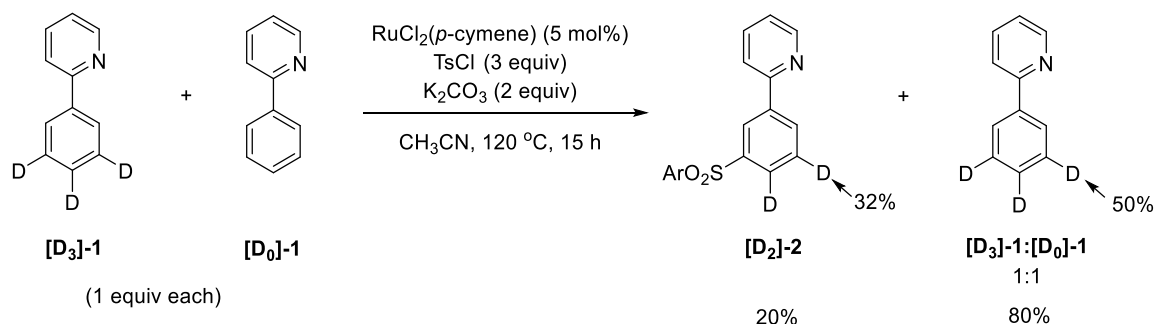

Following the general procedure described above, a mixture of **[D<sub>n</sub>]-2** ( $^1\text{H}$  NMR ratio H5:D5 2.1:1, 43 mg, 20%) and a mixture of the re-isolated **[D<sub>0</sub>]-1** and **[D<sub>5</sub>]-1** ( $^1\text{H}$  NMR ratio 1:1, 87 mg, 80%) was obtained.

## 4.2. Single turnover experiment

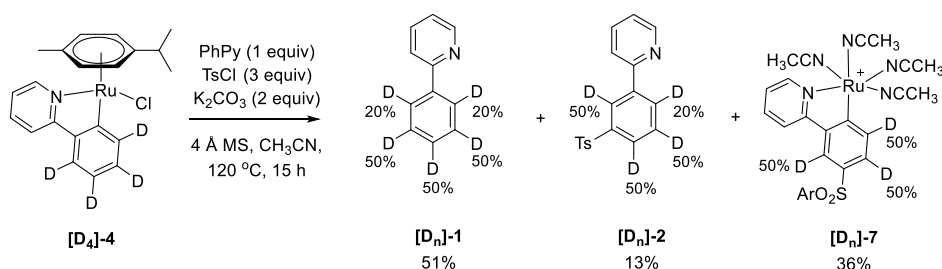

2-Phenyl pyridine was purified by distillation and dried using 4 Å molecular sieves before use. Tosyl chloride was purified by recrystallisation and thoroughly dried before use.

To a flame dried ampule purged with argon, K<sub>2</sub>CO<sub>3</sub> (69 mg, 0.5 mmol) and activated molecular sieves 4 Å (100 mg) were added. Ruthenium complex **[D<sub>4</sub>]-5** (107 mg, 0.15 mmol), 2-phenyl pyridine (35 µL, 0.25 mmol), tosyl chloride (143 mg, 0.75 mmol) and dry CH<sub>3</sub>CN (2.5 mL) were then added and the reaction mixture was heated at 120 °C for 15 h.

Analysis of the crude reaction mixture by <sup>1</sup>H-NMR was used to calculate reaction composition with respect to total pyridine content. The reaction mixture was purified through oven-dried neutral alumina (Al<sub>2</sub>O<sub>3</sub>) and eluted with CH<sub>3</sub>CN to separate the Ru complex **[D<sub>n</sub>]-7** and a mixture of **[D<sub>n</sub>]-1** and **[D<sub>n</sub>]-2**. The fraction corresponding to the mixture of **[D<sub>n</sub>]-1** and **[D<sub>n</sub>]-2** was re-purified by flash chromatography over silica. Deuterium incorporation was calculated by <sup>1</sup>H-NMR.

### Ratios of **[D<sub>n</sub>]-1**, **[D<sub>n</sub>]-2** and **[D<sub>n</sub>]-7**

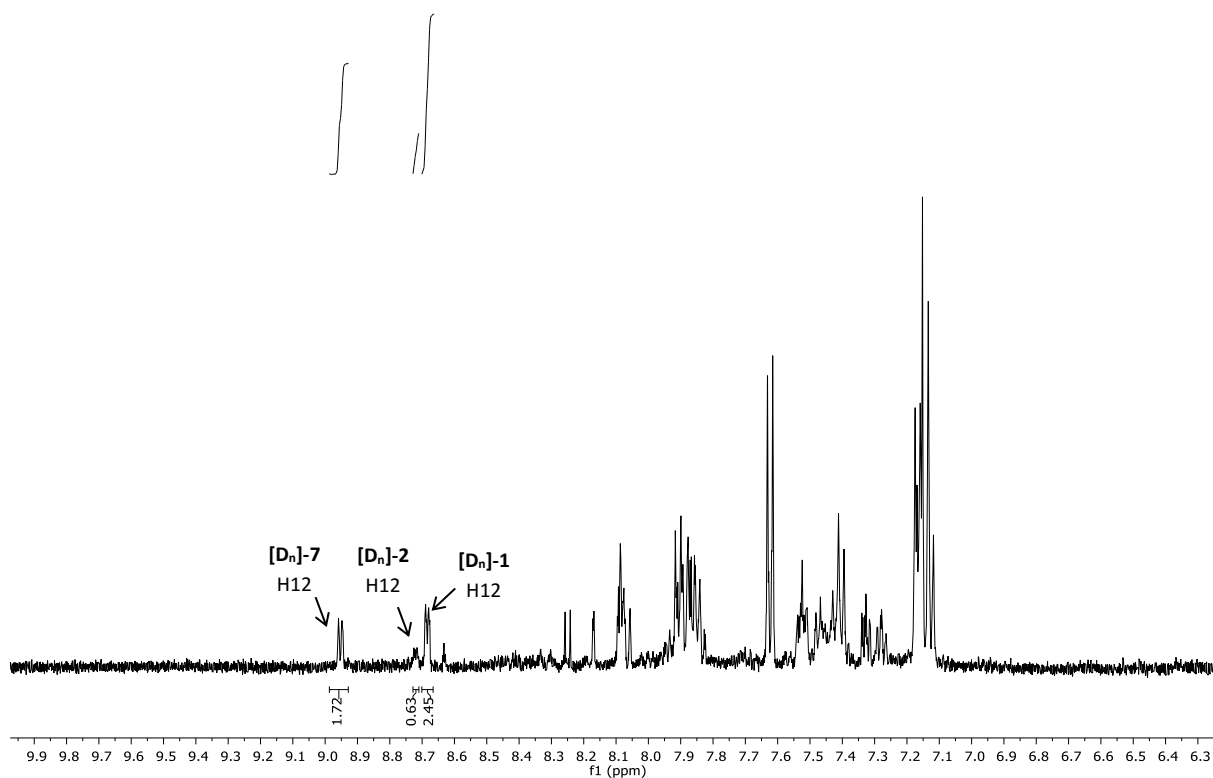

## Deuterium Incorporation

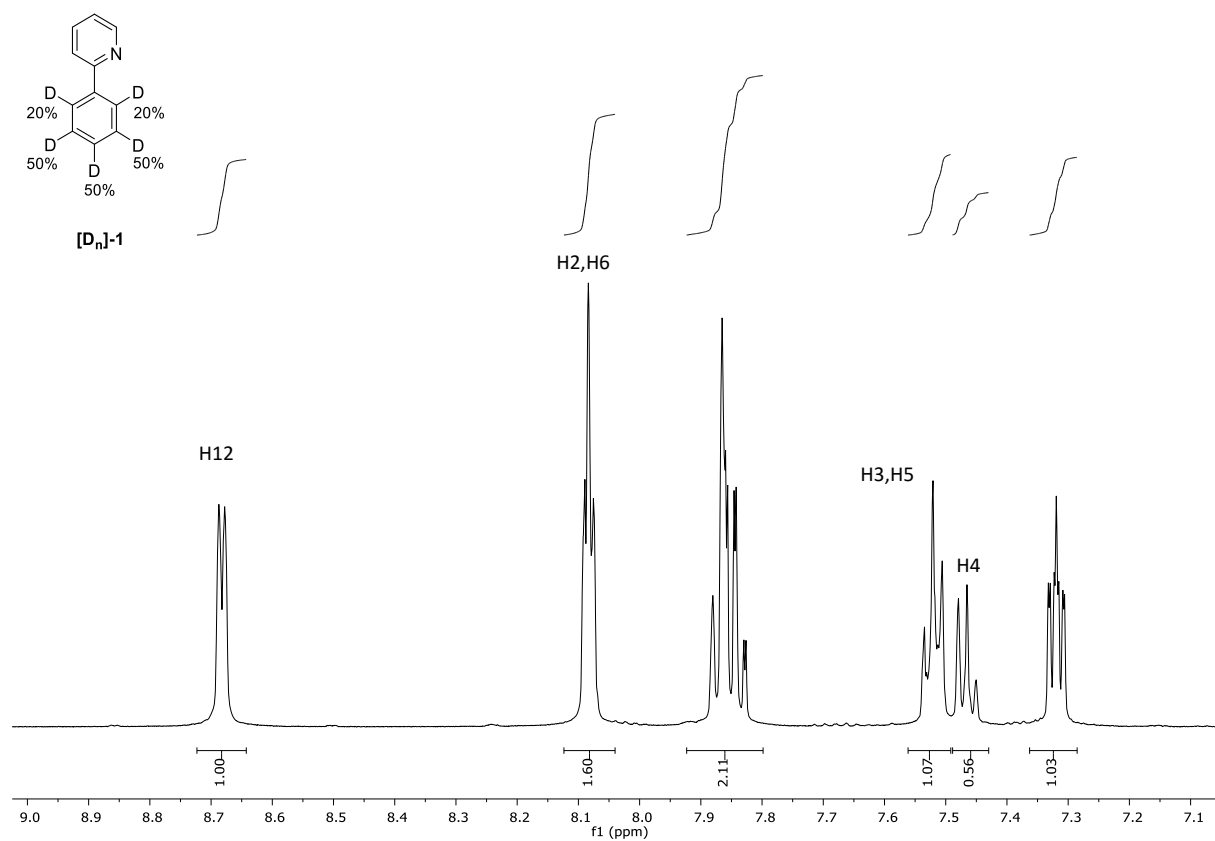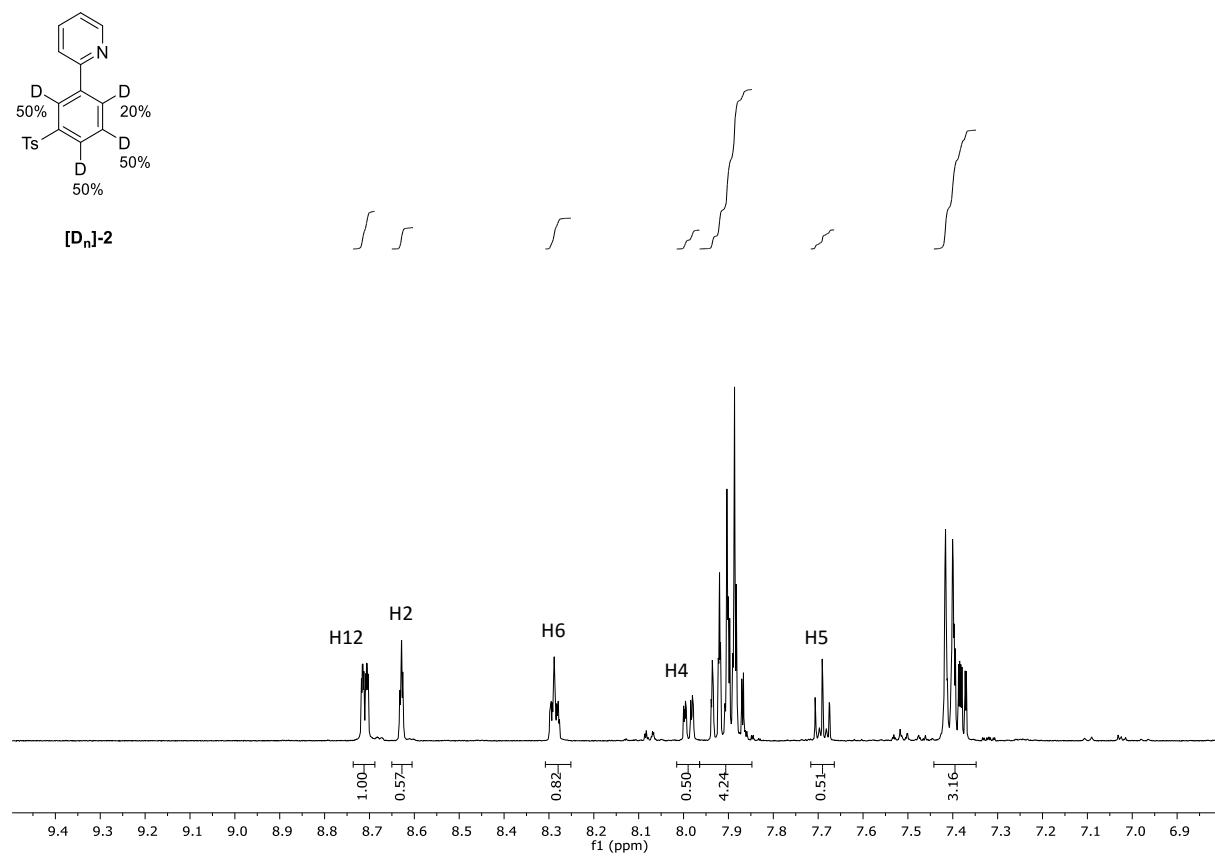



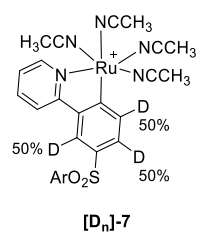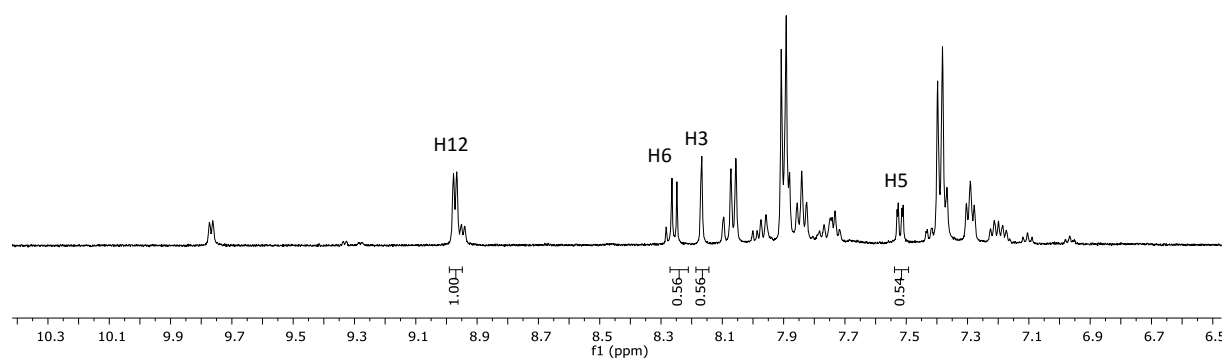

Chemical structure of the ruthenium complex  $[Ru(PhSO_2)(PPh_3)_3]^+ PF_6^-$ . The structure shows a ruthenium center coordinated to a sulfonate group (SO<sub>2</sub>Ph) and three triphenylphosphine ligands. The sulfonate group is numbered 1-6, the phosphorus atoms are 7-9, and the phenyl rings are 10-12.

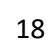

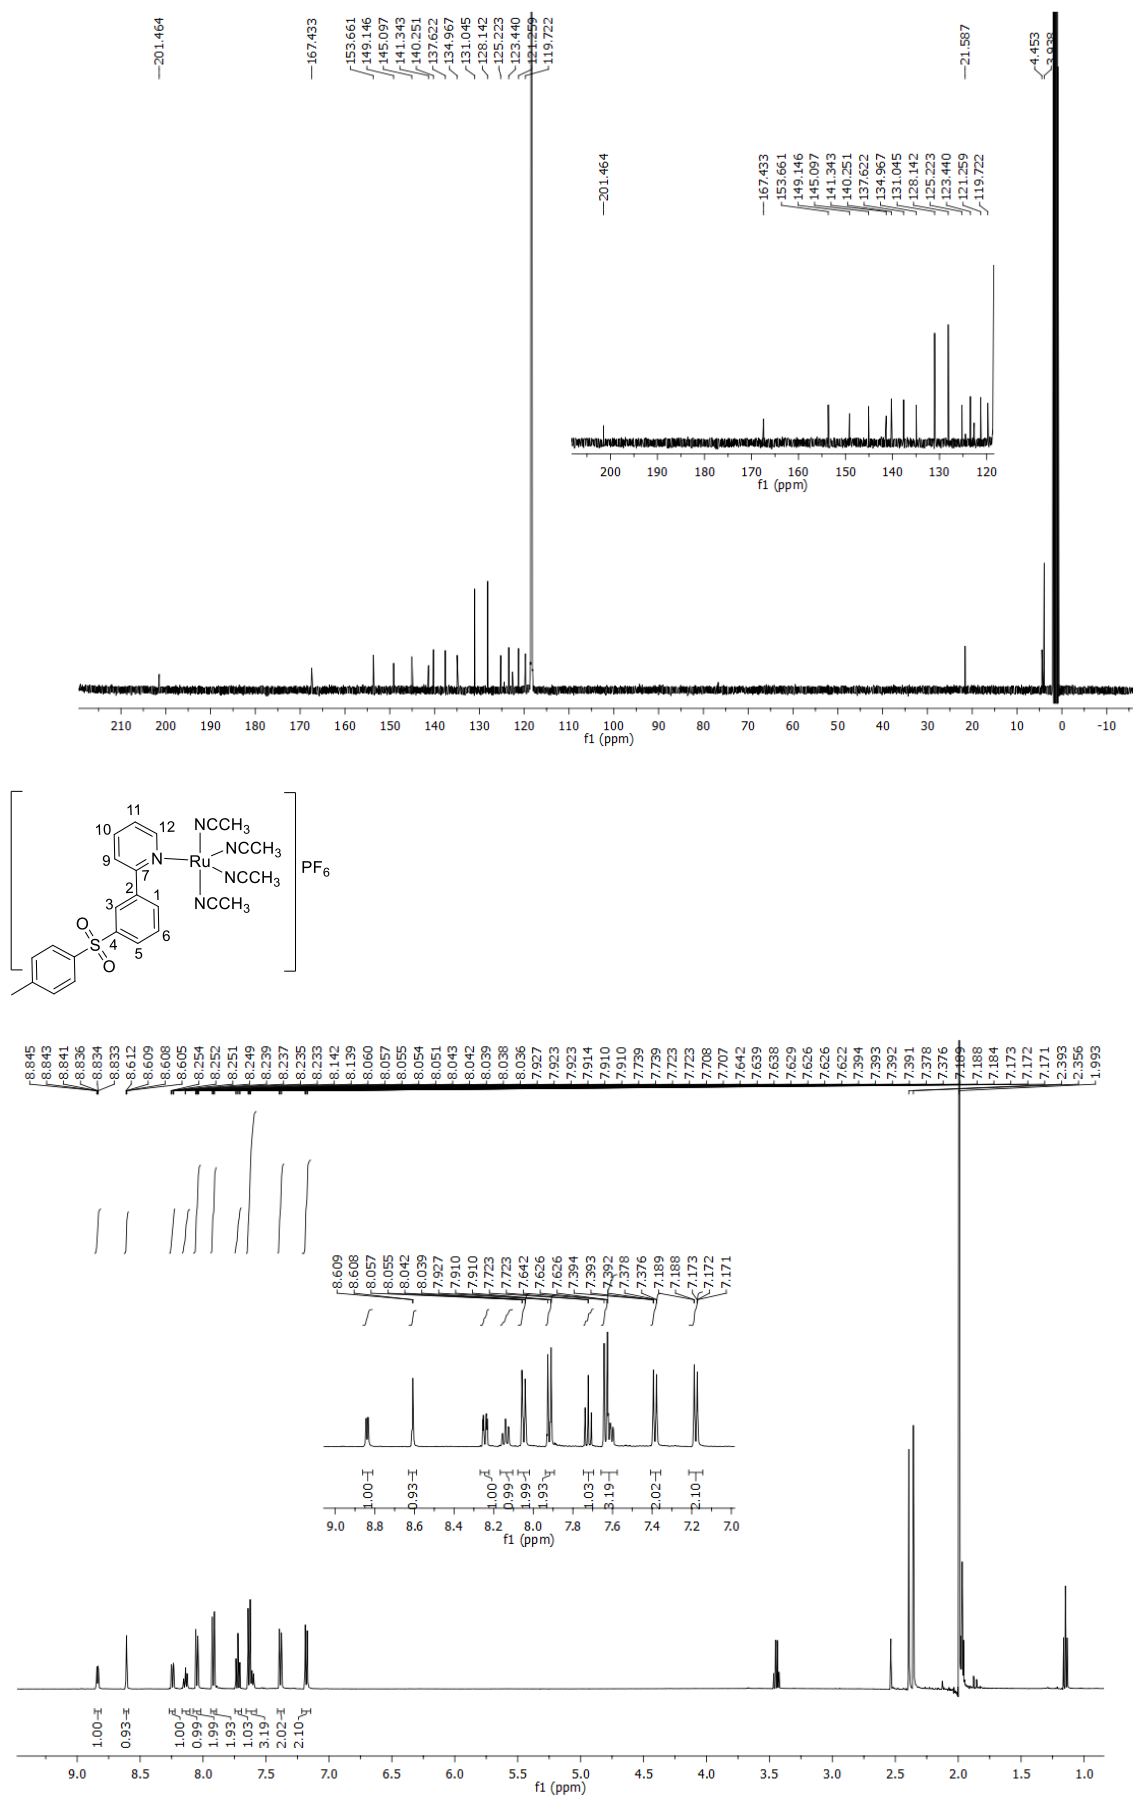

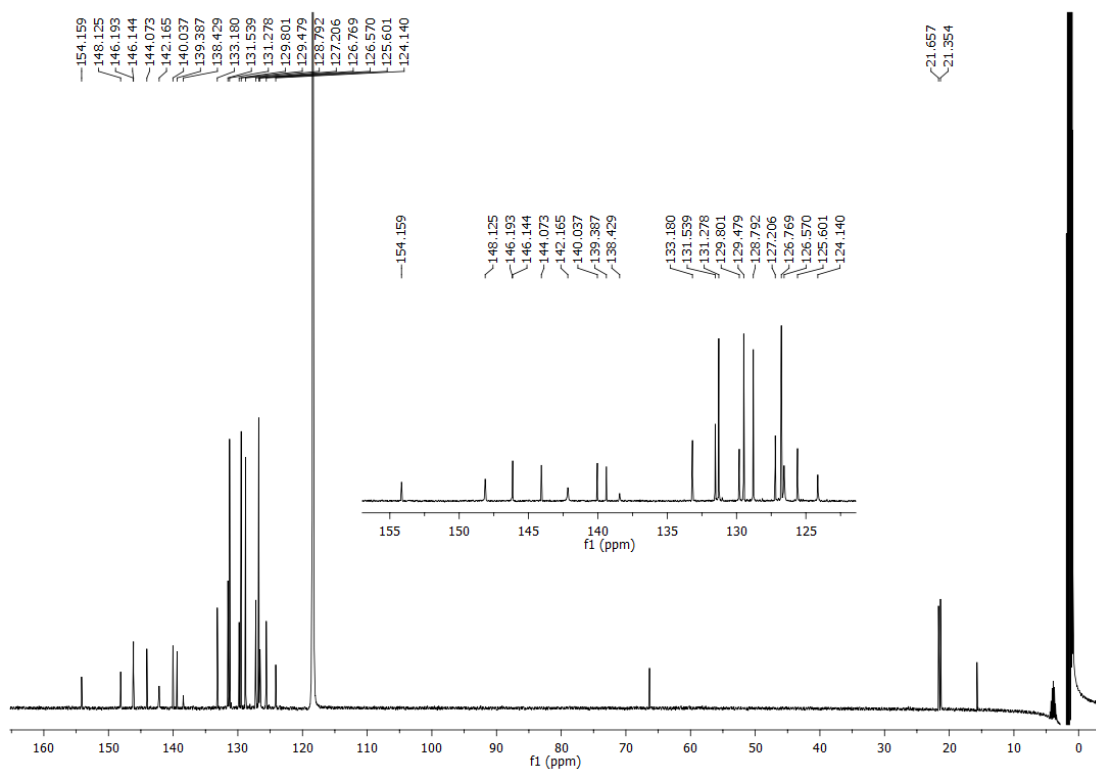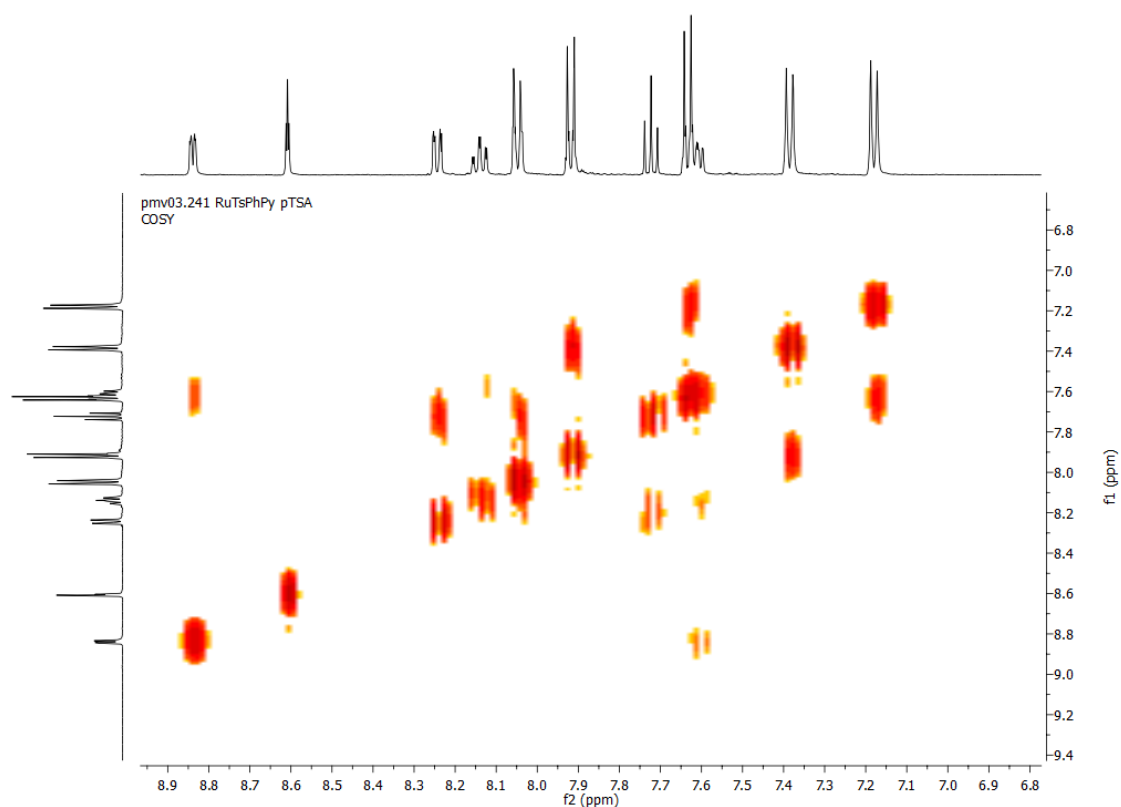

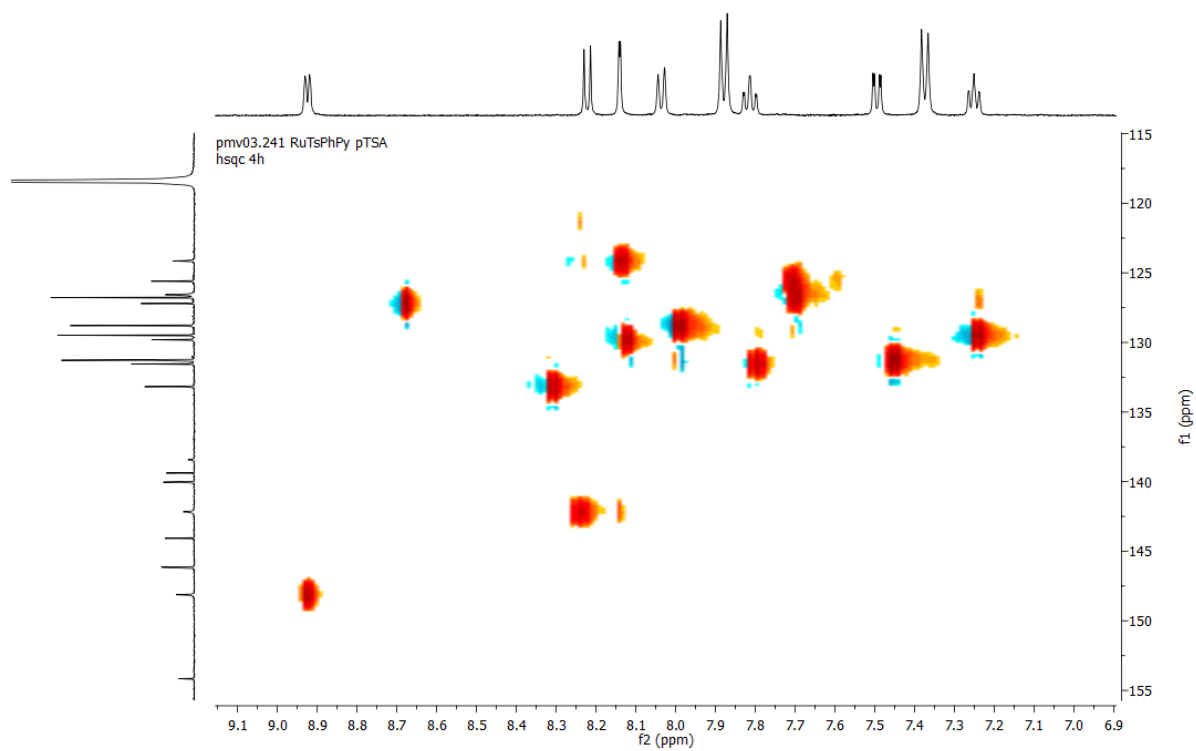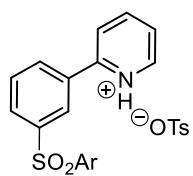



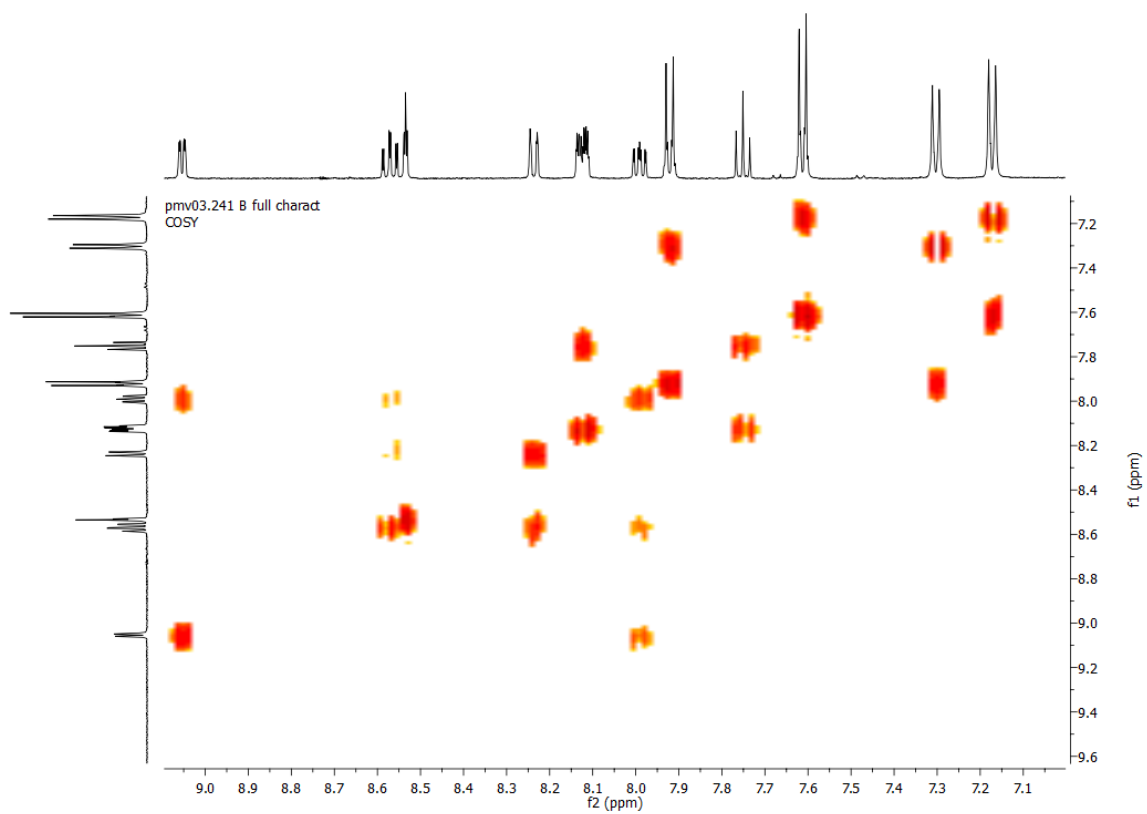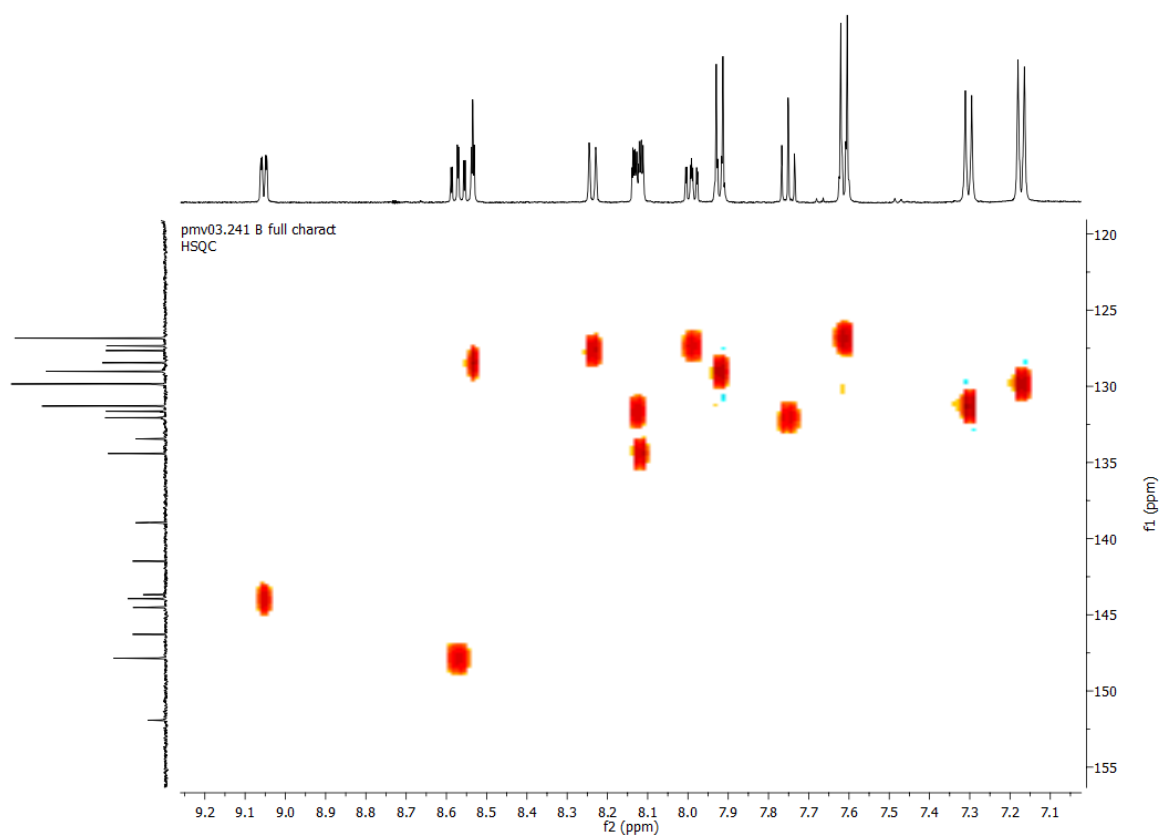

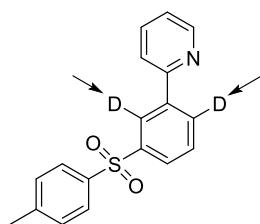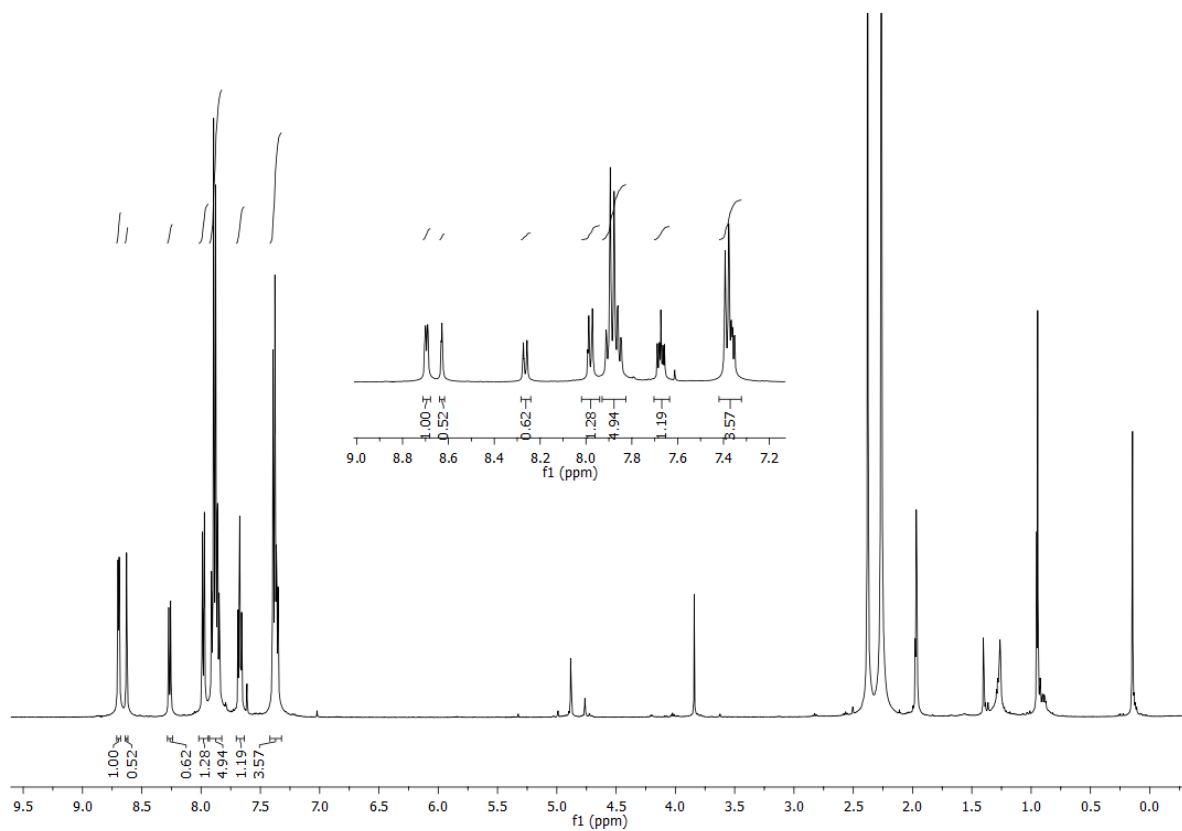



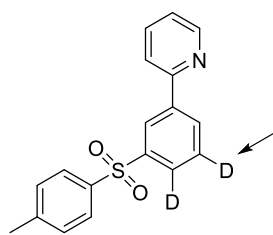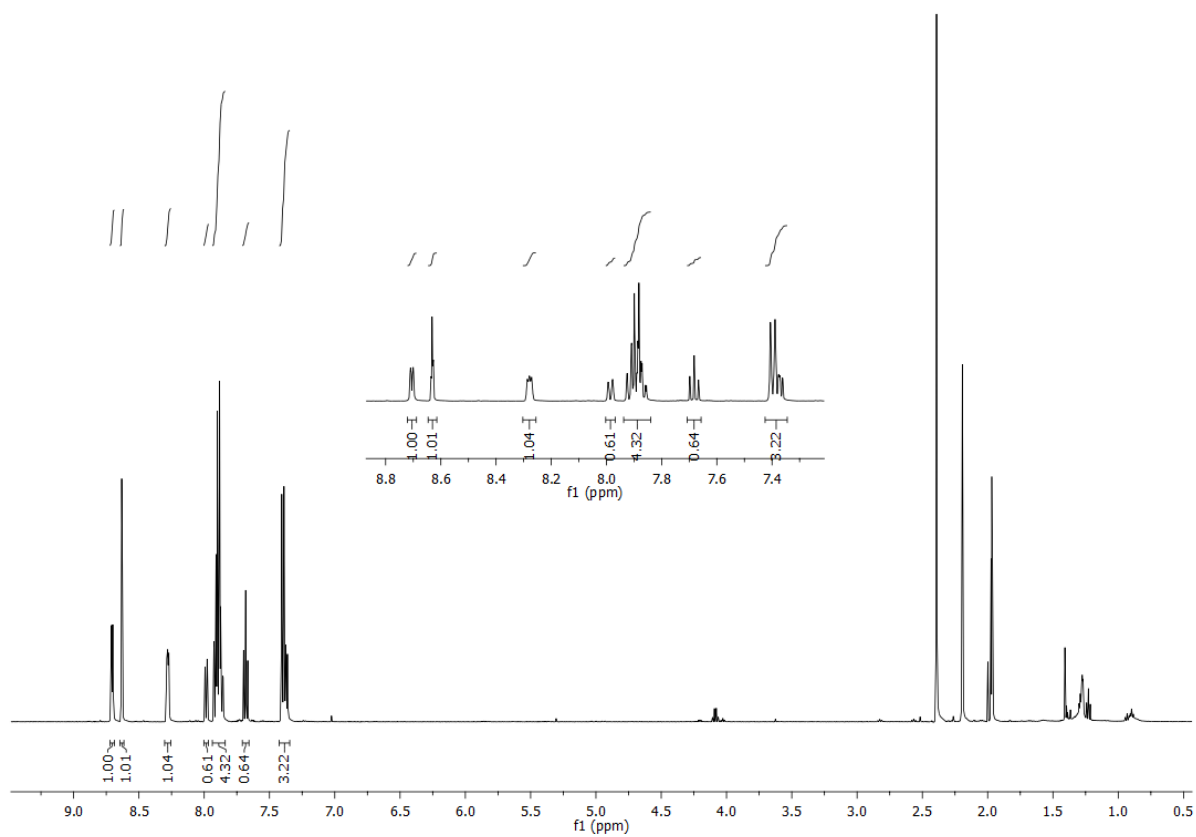

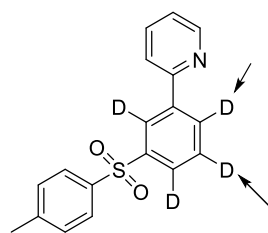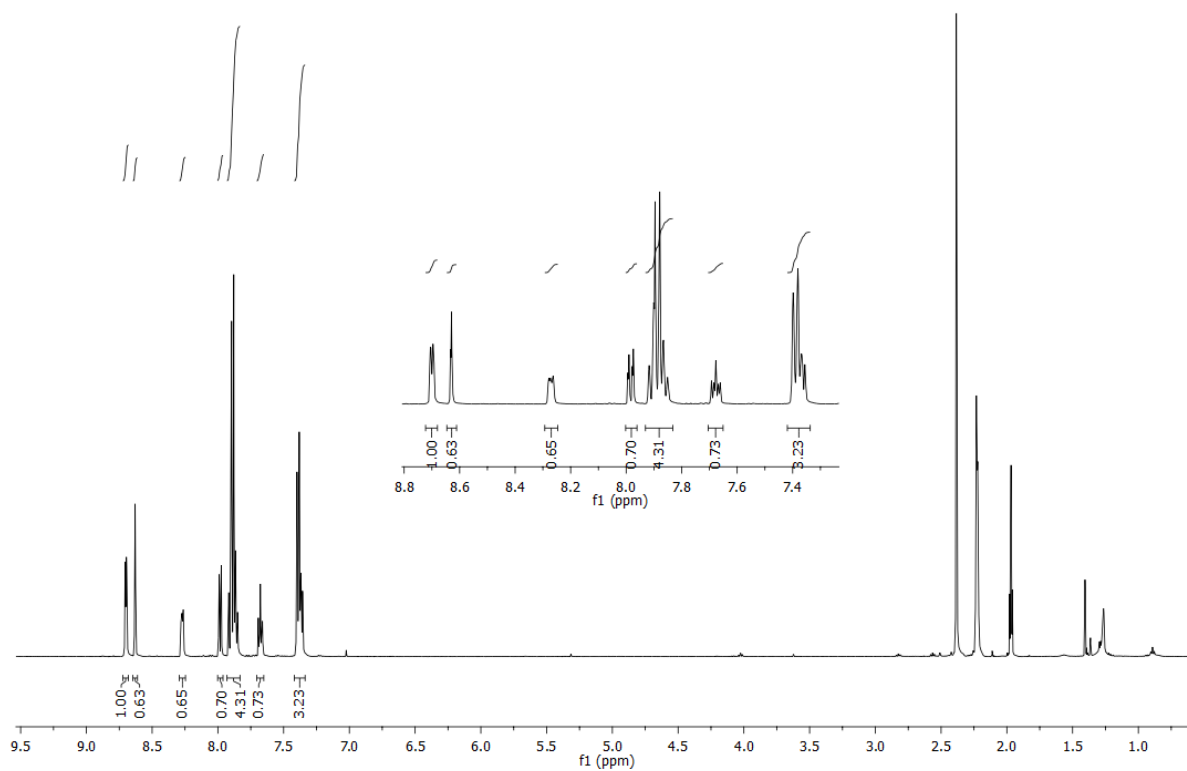

## 6. X-Ray structure and data for complex 7

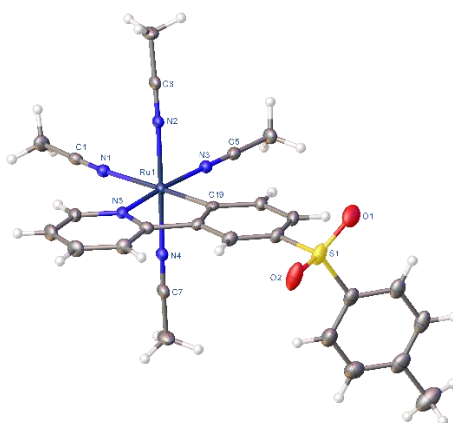

**Table 1 Crystal data and structure refinement for 7.**

|                                                |                                                                                   |
|------------------------------------------------|-----------------------------------------------------------------------------------|
| Identification code                            | 1479685                                                                           |
| Empirical formula                              | C <sub>30</sub> H <sub>36</sub> F <sub>6</sub> N <sub>5</sub> O <sub>3</sub> PRuS |
| Formula weight                                 | 792.74                                                                            |
| Temperature/K                                  | 150.15                                                                            |
| Crystal system                                 | triclinic                                                                         |
| Space group                                    | P-1                                                                               |
| a/Å                                            | 8.2870(1)                                                                         |
| b/Å                                            | 8.4860(1)                                                                         |
| c/Å                                            | 25.3050(5)                                                                        |
| $\alpha/^\circ$                                | 95.062(1)                                                                         |
| $\beta/^\circ$                                 | 92.854(1)                                                                         |
| $\gamma/^\circ$                                | 97.449(1)                                                                         |
| Volume/Å <sup>3</sup>                          | 1754.25(5)                                                                        |
| Z                                              | 2                                                                                 |
| $\rho_{\text{calc}}/\text{cm}^3$               | 1.501                                                                             |
| $\mu/\text{mm}^{-1}$                           | 0.622                                                                             |
| F(000)                                         | 808.0                                                                             |
| Crystal size/mm <sup>3</sup>                   | 0.3 × 0.25 × 0.05                                                                 |
| Radiation                                      | MoK $\alpha$ ( $\lambda$ = 0.71073)                                               |
| 2 $\theta$ range for data collection/ $^\circ$ | 7.162 to 55.304                                                                   |
| Index ranges                                   | -10 ≤ h ≤ 10, -11 ≤ k ≤ 11, -32 ≤ l ≤ 33                                          |
| Reflections collected                          | 29703                                                                             |
| Independent reflections                        | 7976 [ $R_{\text{int}}$ = 0.0668, $R_{\text{sigma}}$ = 0.0727]                    |
| Data/restraints/parameters                     | 7976/69/467                                                                       |
| Goodness-of-fit on $F^2$                       | 1.035                                                                             |
| Final R indexes [ $I \geq 2\sigma(I)$ ]        | $R_1$ = 0.0439, $wR_2$ = 0.0819                                                   |
| Final R indexes [all data]                     | $R_1$ = 0.0667, $wR_2$ = 0.0883                                                   |
| Largest diff. peak/hole / e Å <sup>-3</sup>    | 0.71/-0.54                                                                        |

### Notes:

Asymmetric unit contains one molecule of solvent (Et<sub>2</sub>O) in addition to one salt molecule. F3-F6 were found to be disordered in a 65:35 ratio over 2 sites. P-F distance similarity restraints were imposed in the anion. ADPs pertaining to 35% occupancy fluorines were also restrained to assist convergence.

**Table 2 Fractional Atomic Coordinates ( $\times 10^4$ ) and Equivalent Isotropic Displacement Parameters ( $\text{\AA}^2 \times 10^3$ ) for k13cgf2.  $U_{\text{eq}}$  is defined as 1/3 of the trace of the orthogonalised  $U_{ij}$  tensor.**

| Atom | x          | y          | z          | U(eq)     |
|------|------------|------------|------------|-----------|
| Ru1  | -34.1(2)   | 1435.0(3)  | 1710.3(2)  | 22.21(7)  |
| S1   | 2410.3(10) | 5114.0(11) | 4060.0(3)  | 47.4(2)   |
| P1   | 3428.0(9)  | 7141.2(9)  | 657.2(3)   | 33.08(18) |
| F1   | 4467(3)    | 8838(3)    | 641.7(12)  | 91.5(9)   |
| F2   | 2413(3)    | 5445(2)    | 669.9(12)  | 87.0(8)   |
| F3   | 2674(10)   | 7360(6)    | 102(2)     | 99.1(18)  |
| F4   | 4798(6)    | 6275(5)    | 382(3)     | 77.8(19)  |
| F5   | 4339(11)   | 6884(10)   | 1205(2)    | 134(3)    |
| F6   | 2111(7)    | 8020(5)    | 918(4)     | 105(3)    |
| F3A  | 4070(20)   | 6620(20)   | 134(5)     | 149(6)    |
| F4A  | 4936(10)   | 6726(13)   | 941(6)     | 94(4)     |
| F5A  | 2694(19)   | 7580(20)   | 1183(5)    | 149(6)    |
| F6A  | 1824(10)   | 7618(13)   | 387(6)     | 87(3)     |
| O1   | 3120(3)    | 6745(3)    | 4013.1(10) | 62.1(7)   |
| O2   | 1079(3)    | 4818(4)    | 4399.3(9)  | 67.5(8)   |
| O3   | 8504(3)    | 7465(3)    | 3022.7(10) | 60.9(7)   |
| N1   | -1074(3)   | 126(3)     | 977.1(9)   | 27.2(5)   |
| N2   | -664(2)    | 3403(3)    | 1404.1(8)  | 25.1(5)   |
| N3   | 2126(3)    | 1854(3)    | 1368.2(8)  | 26.5(5)   |
| N4   | 595(2)     | -576(3)    | 1977.9(9)  | 25.8(5)   |
| N5   | -2087(2)   | 1163(2)    | 2135.2(8)  | 24.3(5)   |
| C1   | -1508(3)   | -498(3)    | 566.0(11)  | 28.5(6)   |
| C2   | -2012(4)   | -1284(4)   | 40.2(11)   | 40.3(7)   |
| C3   | -994(3)    | 4435(3)    | 1180.3(11) | 30.4(6)   |
| C4   | -1435(4)   | 5742(4)    | 891.3(14)  | 45.4(8)   |
| C5   | 3368(3)    | 2207(3)    | 1204.7(10) | 28.1(6)   |
| C6   | 4958(3)    | 2694(4)    | 1002.2(12) | 37.4(7)   |
| C7   | 976(3)     | -1707(3)   | 2126.7(12) | 31.3(6)   |
| C8   | 1527(4)    | -3146(4)   | 2306.0(15) | 48.2(8)   |
| C9   | -3535(3)   | 328(3)     | 1951.8(11) | 30.9(6)   |
| C10  | -4871(3)   | 155(4)     | 2258.6(13) | 39.6(7)   |
| C11  | -4706(3)   | 842(4)     | 2779.5(13) | 40.6(7)   |
| C12  | -3233(3)   | 1689(4)    | 2974.2(12) | 36.1(7)   |
| C13  | -1927(3)   | 1852(3)    | 2645.7(10) | 26.9(6)   |
| C14  | -290(3)    | 2700(3)    | 2805.5(10) | 27.0(6)   |
| C15  | 164(3)     | 3458(3)    | 3311.1(11) | 33.9(6)   |
| C16  | 1764(3)    | 4166(4)    | 3423.5(11) | 34.5(7)   |
| C17  | 2908(3)    | 4111(3)    | 3044.0(11) | 33.1(6)   |
| C18  | 2457(3)    | 3359(3)    | 2544.3(11) | 28.4(6)   |
| C19  | 844(3)     | 2631(3)    | 2403.9(10) | 24.2(5)   |
| C20  | 4020(4)    | 4070(4)    | 4260.1(11) | 41.6(8)   |
| C21  | 5596(4)    | 4856(4)    | 4325.9(11) | 44.5(8)   |
| C22  | 6854(4)    | 4025(5)    | 4472.0(12) | 51.8(9)   |
| C23  | 6560(4)    | 2409(5)    | 4544.8(12) | 54.9(10)  |
| C24  | 4974(5)    | 1648(5)    | 4471.7(15) | 64(1)     |

|     |          |         |            |          |
|-----|----------|---------|------------|----------|
| C25 | 3697(4)  | 2474(5) | 4331.7(14) | 57.5(10) |
| C26 | 7945(5)  | 1531(6) | 4714.5(16) | 78.8(13) |
| C27 | 6776(4)  | 5928(5) | 2338.7(15) | 59.5(10) |
| C28 | 7010(4)  | 6527(5) | 2912.8(16) | 61(1)    |
| C29 | 8795(5)  | 8042(5) | 3561.1(17) | 74.4(12) |
| C30 | 10375(5) | 9138(5) | 3630.6(19) | 82.4(14) |

**Table 3 Anisotropic Displacement Parameters ( $\text{\AA}^2 \times 10^3$ ) for 7. The Anisotropic displacement factor exponent takes the form:  $-2\pi^2[h^2a^{*2}U_{11}+2hka^*b^*U_{12}+\dots]$ .**

| Atom | $U_{11}$  | $U_{22}$  | $U_{33}$  | $U_{23}$  | $U_{13}$  | $U_{12}$ |
|------|-----------|-----------|-----------|-----------|-----------|----------|
| Ru1  | 19.45(11) | 20.65(12) | 26.67(12) | 4.85(8)   | 0.40(8)   | 1.88(7)  |
| S1   | 37.8(4)   | 65.4(6)   | 36.3(4)   | -11.9(4)  | -6.2(3)   | 11.9(4)  |
| P1   | 30.6(4)   | 30.3(4)   | 38.7(4)   | 3.1(3)    | 6.7(3)    | 4.1(3)   |
| F1   | 59.8(14)  | 39.4(13)  | 171(3)    | 11.9(15)  | 6.1(15)   | -8.4(10) |
| F2   | 52.1(13)  | 43.2(13)  | 171(3)    | 34.9(15)  | 29.5(14)  | 0(1)     |
| F3   | 154(6)    | 81(3)     | 62(3)     | 11(2)     | -37(3)    | 29(4)    |
| F4   | 60(3)     | 45(2)     | 138(6)    | 18(3)     | 47(3)     | 21.4(19) |
| F5   | 193(9)    | 151(6)    | 53(3)     | 17(3)     | -38(4)    | 12(6)    |
| F6   | 77(4)     | 56(3)     | 187(8)    | -20(4)    | 83(4)     | 15(2)    |
| F3A  | 168(12)   | 189(12)   | 74(7)     | -55(7)    | 74(8)     | -22(9)   |
| F4A  | 40(4)     | 91(6)     | 155(11)   | 51(8)     | -43(6)    | 16(4)    |
| F5A  | 153(11)   | 231(14)   | 67(6)     | -39(7)    | 53(6)     | 57(9)    |
| F6A  | 55(5)     | 71(6)     | 134(9)    | 59(6)     | -44(5)    | -17(4)   |
| O1   | 68.9(16)  | 46.0(15)  | 65.4(16)  | -18.4(12) | -19.9(13) | 10.8(12) |
| O2   | 36.4(13)  | 123(2)    | 38.7(13)  | -18.7(14) | 0.5(10)   | 12.8(14) |
| O3   | 54.4(15)  | 59.9(17)  | 64.9(17)  | -0.9(13)  | 5.2(12)   | -1.0(12) |
| N1   | 27.4(12)  | 25.6(13)  | 29.0(13)  | 5.2(10)   | 1.6(9)    | 3.1(9)   |
| N2   | 20.1(11)  | 24.2(12)  | 30.7(12)  | 5.3(10)   | 0.7(9)    | 0.4(9)   |
| N3   | 24.4(12)  | 25.1(12)  | 30.2(12)  | 5.6(10)   | -0.1(9)   | 2.4(9)   |
| N4   | 21.4(11)  | 24.2(13)  | 31.6(12)  | 3.9(10)   | 2.4(9)    | 1.9(9)   |
| N5   | 20.0(11)  | 23.6(12)  | 29.9(12)  | 6.7(10)   | -0.8(9)   | 3.7(9)   |
| C1   | 28.7(14)  | 25.2(15)  | 33.1(16)  | 9.3(13)   | 6.7(12)   | 3.3(11)  |
| C2   | 49.9(19)  | 38.9(18)  | 29.1(15)  | 0.3(14)   | -0.2(13)  | -2.5(14) |
| C3   | 19.3(13)  | 29.3(16)  | 42.2(16)  | 7.7(13)   | 0.9(11)   | -1.1(11) |
| C4   | 36.8(17)  | 35.4(18)  | 67(2)     | 24.9(17)  | -2.8(15)  | 6.2(13)  |
| C5   | 28.9(15)  | 25.7(15)  | 29.8(14)  | 3.7(12)   | -2.1(11)  | 5.0(11)  |
| C6   | 25.5(14)  | 40.6(18)  | 46.3(18)  | 10.4(15)  | 4.2(12)   | -0.1(12) |
| C7   | 22.4(13)  | 26.6(16)  | 44.9(17)  | 7.8(13)   | 2.4(12)   | -0.1(11) |
| C8   | 40.0(18)  | 30.6(18)  | 77(2)     | 19.9(17)  | 0.1(16)   | 8.9(14)  |
| C9   | 24.2(14)  | 30.3(16)  | 37.8(16)  | 6.8(13)   | -1.9(11)  | 1.4(11)  |
| C10  | 21.3(14)  | 43.4(19)  | 54(2)     | 12.7(16)  | 2.7(13)   | 0.1(12)  |
| C11  | 28.5(15)  | 48(2)     | 47.4(19)  | 12.1(16)  | 13.2(13)  | 5.9(13)  |
| C12  | 33.8(16)  | 40.5(18)  | 35.3(16)  | 4.2(14)   | 6.4(12)   | 7.6(13)  |
| C13  | 26.6(14)  | 25.5(15)  | 30.3(14)  | 6.6(12)   | 4.8(11)   | 6.1(11)  |
| C14  | 27.6(14)  | 26.5(15)  | 28.1(14)  | 5.5(12)   | -2.0(11)  | 7.4(11)  |
| C15  | 33.8(15)  | 39.9(17)  | 29.3(15)  | 3.7(13)   | 1.6(12)   | 10.2(12) |
| C16  | 35.2(16)  | 37.8(17)  | 29.4(15)  | -0.8(13)  | -8.2(12)  | 7.3(13)  |

|     |          |          |          |          |          |          |
|-----|----------|----------|----------|----------|----------|----------|
| C17 | 24.3(14) | 33.6(17) | 40.4(16) | 4.0(13)  | -6.1(12) | 2.7(11)  |
| C18 | 25.9(14) | 26.0(15) | 32.5(15) | 1.5(12)  | -1.9(11) | 2.9(11)  |
| C19 | 25.3(13) | 20.4(14) | 28.6(13) | 8.5(11)  | -2.1(10) | 7.1(10)  |
| C20 | 36.4(17) | 60(2)    | 26.5(15) | 0.5(15)  | -3.8(12) | 5.1(15)  |
| C21 | 39.1(17) | 63(2)    | 28.9(16) | -3.4(15) | 0.4(13)  | 4.8(15)  |
| C22 | 34.2(17) | 86(3)    | 33.0(17) | -7.3(18) | 0.9(13)  | 8.0(17)  |
| C23 | 52(2)    | 85(3)    | 29.6(17) | 1.1(18)  | -3.2(15) | 20(2)    |
| C24 | 69(3)    | 67(3)    | 57(2)    | 20(2)    | -7.1(19) | 7(2)     |
| C25 | 43(2)    | 75(3)    | 53(2)    | 18(2)    | -8.6(16) | -2.6(18) |
| C26 | 79(3)    | 107(4)   | 57(2)    | -3(2)    | -7(2)    | 49(3)    |
| C27 | 49(2)    | 60(2)    | 65(2)    | -2(2)    | 6.2(18)  | -4.3(17) |
| C28 | 47(2)    | 59(3)    | 74(3)    | -1(2)    | 19.6(19) | -2.0(18) |
| C29 | 84(3)    | 67(3)    | 69(3)    | -7(2)    | -3(2)    | 11(2)    |
| C30 | 93(3)    | 53(3)    | 95(3)    | 3(2)     | -29(3)   | 6(2)     |

**Table 4 Bond Lengths for 7.**

| Atom | Atom | Length/Å | Atom | Atom | Length/Å |
|------|------|----------|------|------|----------|
| Ru1  | N1   | 2.156(2) | N5   | C9   | 1.351(3) |
| Ru1  | N2   | 2.019(2) | N5   | C13  | 1.363(3) |
| Ru1  | N3   | 2.031(2) | C1   | C2   | 1.451(4) |
| Ru1  | N4   | 2.010(2) | C3   | C4   | 1.456(4) |
| Ru1  | N5   | 2.056(2) | C5   | C6   | 1.460(4) |
| Ru1  | C19  | 2.002(3) | C7   | C8   | 1.459(4) |
| S1   | O1   | 1.450(3) | C9   | C10  | 1.383(4) |
| S1   | O2   | 1.442(2) | C10  | C11  | 1.386(4) |
| S1   | C16  | 1.761(3) | C11  | C12  | 1.379(4) |
| S1   | C20  | 1.772(3) | C12  | C13  | 1.397(4) |
| P1   | F1   | 1.584(2) | C13  | C14  | 1.471(4) |
| P1   | F2   | 1.574(2) | C14  | C15  | 1.391(4) |
| P1   | F3   | 1.544(4) | C14  | C19  | 1.421(4) |
| P1   | F4   | 1.588(4) | C15  | C16  | 1.388(4) |
| P1   | F5   | 1.592(5) | C16  | C17  | 1.385(4) |
| P1   | F6   | 1.543(4) | C17  | C18  | 1.376(4) |
| P1   | F3A  | 1.501(8) | C18  | C19  | 1.412(4) |
| P1   | F4A  | 1.507(6) | C20  | C21  | 1.382(4) |
| P1   | F5A  | 1.527(8) | C20  | C25  | 1.376(5) |
| P1   | F6A  | 1.579(6) | C21  | C22  | 1.386(4) |
| O3   | C28  | 1.383(4) | C22  | C23  | 1.392(5) |
| O3   | C29  | 1.405(5) | C23  | C24  | 1.383(5) |
| N1   | C1   | 1.144(3) | C23  | C26  | 1.512(5) |
| N2   | C3   | 1.139(3) | C24  | C25  | 1.391(5) |
| N3   | C5   | 1.142(3) | C27  | C28  | 1.491(5) |
| N4   | C7   | 1.137(3) | C29  | C30  | 1.498(6) |

**Table 5 Bond Angles for 7.**

| Atom | Atom | Atom | Angle/°    | Atom | Atom | Atom | Angle/°    |
|------|------|------|------------|------|------|------|------------|
| N2   | Ru1  | N1   | 86.57(8)   | F5A  | P1   | F2   | 85.9(6)    |
| N2   | Ru1  | N3   | 87.70(8)   | F5A  | P1   | F6A  | 85.5(7)    |
| N2   | Ru1  | N5   | 92.62(8)   | F6A  | P1   | F1   | 95.0(3)    |
| N3   | Ru1  | N1   | 89.12(8)   | C28  | O3   | C29  | 113.3(3)   |
| N3   | Ru1  | N5   | 173.28(9)  | C1   | N1   | Ru1  | 173.7(2)   |
| N4   | Ru1  | N1   | 90.80(8)   | C3   | N2   | Ru1  | 172.8(2)   |
| N4   | Ru1  | N2   | 177.12(9)  | C5   | N3   | Ru1  | 174.1(2)   |
| N4   | Ru1  | N3   | 91.09(8)   | C7   | N4   | Ru1  | 178.9(2)   |
| N4   | Ru1  | N5   | 88.89(8)   | C9   | N5   | Ru1  | 125.11(18) |
| N5   | Ru1  | N1   | 97.60(8)   | C9   | N5   | C13  | 118.7(2)   |
| C19  | Ru1  | N1   | 177.68(9)  | C13  | N5   | Ru1  | 116.15(16) |
| C19  | Ru1  | N2   | 93.56(9)   | N1   | C1   | C2   | 178.4(3)   |
| C19  | Ru1  | N3   | 93.20(9)   | N2   | C3   | C4   | 179.3(3)   |
| C19  | Ru1  | N4   | 89.11(9)   | N3   | C5   | C6   | 178.7(3)   |
| C19  | Ru1  | N5   | 80.08(9)   | N4   | C7   | C8   | 177.6(3)   |
| O1   | S1   | C16  | 109.40(15) | N5   | C9   | C10  | 122.8(3)   |
| O1   | S1   | C20  | 107.01(16) | C9   | C10  | C11  | 118.6(3)   |
| O2   | S1   | O1   | 119.24(16) | C12  | C11  | C10  | 119.4(3)   |
| O2   | S1   | C16  | 107.48(14) | C11  | C12  | C13  | 119.9(3)   |
| O2   | S1   | C20  | 109.41(15) | N5   | C13  | C12  | 120.7(2)   |
| C16  | S1   | C20  | 103.14(14) | N5   | C13  | C14  | 114.0(2)   |
| F1   | P1   | F4   | 91.50(19)  | C12  | C13  | C14  | 125.3(3)   |
| F1   | P1   | F5   | 91.6(3)    | C15  | C14  | C13  | 124.0(2)   |
| F2   | P1   | F1   | 179.31(14) | C15  | C14  | C19  | 121.6(2)   |
| F2   | P1   | F4   | 87.82(19)  | C19  | C14  | C13  | 114.3(2)   |
| F2   | P1   | F5   | 88.3(3)    | C16  | C15  | C14  | 119.0(2)   |
| F2   | P1   | F6A  | 85.5(3)    | C15  | C16  | S1   | 120.8(2)   |
| F3   | P1   | F1   | 87.2(3)    | C17  | C16  | S1   | 118.1(2)   |
| F3   | P1   | F2   | 92.8(3)    | C17  | C16  | C15  | 121.1(3)   |
| F3   | P1   | F4   | 89.5(3)    | C18  | C17  | C16  | 119.8(2)   |
| F3   | P1   | F5   | 175.2(4)   | C17  | C18  | C19  | 121.8(2)   |
| F4   | P1   | F5   | 85.9(3)    | C14  | C19  | Ru1  | 115.46(18) |
| F6   | P1   | F1   | 87.2(2)    | C18  | C19  | Ru1  | 127.80(19) |
| F6   | P1   | F2   | 93.4(2)    | C18  | C19  | C14  | 116.7(2)   |
| F6   | P1   | F3   | 89.9(4)    | C21  | C20  | S1   | 119.6(3)   |
| F6   | P1   | F4   | 178.6(3)   | C25  | C20  | S1   | 119.7(2)   |
| F6   | P1   | F5   | 94.7(4)    | C25  | C20  | C21  | 120.7(3)   |
| F3A  | P1   | F1   | 88.9(6)    | C20  | C21  | C22  | 119.3(3)   |
| F3A  | P1   | F2   | 90.5(6)    | C21  | C22  | C23  | 121.1(3)   |
| F3A  | P1   | F4A  | 89.7(8)    | C22  | C23  | C26  | 120.3(4)   |
| F3A  | P1   | F5A  | 176.3(8)   | C24  | C23  | C22  | 118.4(3)   |
| F3A  | P1   | F6A  | 93.2(8)    | C24  | C23  | C26  | 121.3(4)   |
| F4A  | P1   | F1   | 84.6(4)    | C23  | C24  | C25  | 121.0(4)   |
| F4A  | P1   | F2   | 95.0(4)    | C20  | C25  | C24  | 119.5(3)   |
| F4A  | P1   | F5A  | 91.7(7)    | O3   | C28  | C27  | 111.0(3)   |
| F4A  | P1   | F6A  | 177.1(8)   | O3   | C29  | C30  | 109.1(4)   |
| F5A  | P1   | F1   | 94.6(6)    |      |      |      |            |

**Table 6 Torsion Angles for 7.**

| A      | B   | C   | D   | Angle/°     | A       | B   | C   | D | Angle/°   |
|--------|-----|-----|-----|-------------|---------|-----|-----|---|-----------|
| Ru1 N5 | C9  | C10 |     | 178.6(2)    | C13 C14 | C15 | C16 |   | 177.3(2)  |
| Ru1 N5 | C13 | C12 |     | -177.71(19) | C13 C14 | C19 | Ru1 |   | 1.0(3)    |
| Ru1 N5 | C13 | C14 |     | 0.6(3)      | C13 C14 | C19 | C18 |   | -177.0(2) |
| S1     | C16 | C17 | C18 | 179.0(2)    | C14 C15 | C16 | S1  |   | -179.0(2) |
| S1     | C20 | C21 | C22 | -178.7(2)   | C14 C15 | C16 | C17 |   | -0.8(4)   |
| S1     | C20 | C25 | C24 | 177.9(3)    | C15 C14 | C19 | Ru1 |   | 178.4(2)  |
| O1     | S1  | C16 | C15 | -124.5(2)   | C15 C14 | C19 | C18 |   | 0.4(4)    |
| O1     | S1  | C16 | C17 | 57.2(3)     | C15 C16 | C17 | C18 |   | 0.7(4)    |
| O1     | S1  | C20 | C21 | -1.5(3)     | C16 S1  | C20 | C21 |   | 113.8(3)  |
| O1     | S1  | C20 | C25 | -179.4(3)   | C16 S1  | C20 | C25 |   | -64.1(3)  |
| O2     | S1  | C16 | C15 | 6.3(3)      | C16 C17 | C18 | C19 |   | -0.1(4)   |
| O2     | S1  | C16 | C17 | -172.0(2)   | C17 C18 | C19 | Ru1 |   | -178.1(2) |
| O2     | S1  | C20 | C21 | -132.0(2)   | C17 C18 | C19 | C14 |   | -0.4(4)   |
| O2     | S1  | C20 | C25 | 50.1(3)     | C19 C14 | C15 | C16 |   | 0.2(4)    |
| N5     | C9  | C10 | C11 | -1.2(4)     | C20 S1  | C16 | C15 |   | 121.9(2)  |
| N5     | C13 | C14 | C15 | -178.4(2)   | C20 S1  | C16 | C17 |   | -56.4(3)  |
| N5     | C13 | C14 | C19 | -1.0(3)     | C20 C21 | C22 | C23 |   | 1.1(5)    |
| C9     | N5  | C13 | C12 | 0.4(4)      | C21 C20 | C25 | C24 |   | 0.0(5)    |
| C9     | N5  | C13 | C14 | 178.8(2)    | C21 C22 | C23 | C24 |   | -0.5(5)   |
| C9     | C10 | C11 | C12 | 0.7(4)      | C21 C22 | C23 | C26 |   | -178.8(3) |
| C10    | C11 | C12 | C13 | 0.3(4)      | C22 C23 | C24 | C25 |   | -0.4(5)   |
| C11    | C12 | C13 | N5  | -0.9(4)     | C23 C24 | C25 | C20 |   | 0.6(6)    |
| C11    | C12 | C13 | C14 | -179.1(3)   | C25 C20 | C21 | C22 |   | -0.8(5)   |
| C12    | C13 | C14 | C15 | -0.1(4)     | C26 C23 | C24 | C25 |   | 178.0(3)  |
| C12    | C13 | C14 | C19 | 177.2(2)    | C28 O3  | C29 | C30 |   | -175.7(3) |
| C13    | N5  | C9  | C10 | 0.6(4)      | C29 O3  | C28 | C27 |   | -179.2(3) |

**Table 7 Hydrogen Atom Coordinates ( $\text{\AA} \times 10^4$ ) and Isotropic Displacement Parameters ( $\text{\AA}^2 \times 10^3$ ) for 7.**

| Atom | x     | y     | z    | U(eq) |
|------|-------|-------|------|-------|
| H2A  | -2268 | -488  | -198 | 60    |
| H2B  | -2982 | -2065 | 62   | 60    |
| H2C  | -1128 | -1830 | -98  | 60    |
| H4A  | -1771 | 5342  | 522  | 68    |
| H4B  | -493  | 6573  | 899  | 68    |
| H4C  | -2338 | 6191  | 1058 | 68    |
| H6A  | 4868  | 3536  | 765  | 56    |
| H6B  | 5328  | 1774  | 805  | 56    |
| H6C  | 5746  | 3098  | 1300 | 56    |
| H8A  | 1811  | -3820 | 1999 | 72    |
| H8B  | 653   | -3736 | 2486 | 72    |
| H8C  | 2487  | -2849 | 2554 | 72    |
| H9   | -3642 | -160  | 1597 | 37    |



|      |       |       |      |     |
|------|-------|-------|------|-----|
| H10  | -5879 | -423  | 2115 | 48  |
| H11  | -5601 | 731   | 3000 | 49  |
| H12  | -3105 | 2160  | 3331 | 43  |
| H15  | -610  | 3491  | 3575 | 41  |
| H17  | 4002  | 4590  | 3128 | 40  |
| H18  | 3251  | 3331  | 2287 | 34  |
| H21  | 5813  | 5955  | 4271 | 53  |
| H22  | 7936  | 4567  | 4523 | 62  |
| H24  | 4753  | 543   | 4518 | 77  |
| H25  | 2612  | 1941  | 4286 | 69  |
| H26A | 8080  | 1624  | 5103 | 118 |
| H26B | 8954  | 1997  | 4570 | 118 |
| H26C | 7698  | 402   | 4580 | 118 |
| H27A | 6867  | 6836  | 2123 | 89  |
| H27B | 5694  | 5305  | 2268 | 89  |
| H27C | 7613  | 5251  | 2248 | 89  |
| H28A | 6128  | 7161  | 3009 | 73  |
| H28B | 6945  | 5610  | 3131 | 73  |
| H29A | 8848  | 7139  | 3781 | 89  |
| H29B | 7895  | 8624  | 3678 | 89  |
| H30A | 11264 | 8549  | 3522 | 124 |
| H30B | 10577 | 9557  | 4005 | 124 |
| H30C | 10317 | 10026 | 3411 | 124 |

**Table 8 Atomic Occupancy for 7.**

| <b>Atom</b> | <b><i>Occupancy</i></b> | <b>Atom</b> | <b><i>Occupancy</i></b> | <b>Atom</b> | <b><i>Occupancy</i></b> |
|-------------|-------------------------|-------------|-------------------------|-------------|-------------------------|
| F3          | 0.65                    | F4          | 0.65                    | F5          | 0.65                    |
| F6          | 0.65                    | F3A         | 0.35                    | F4A         | 0.35                    |
| F5A         | 0.35                    | F6A         | 0.35                    |             |                         |

## Experimental

Single crystals of  $C_{30}H_{36}F_6N_5O_3PRuS$  **7**. A suitable crystal was selected and [] on a **95mm CCD camera on \k-goniostat** diffractometer. The crystal was kept at 150.15 K during data collection. Using Olex2 [1], the structure was solved with the olex2.solve [2] structure solution program using Charge Flipping and refined with the ShelXL [3] refinement package using Least Squares minimisation.

1. Dolomanov, O.V., Bourhis, L.J., Gildea, R.J., Howard, J.A.K. & Puschmann, H. (2009), J. Appl. Cryst. 42, 339-341.
2. Bourhis, L.J., Dolomanov, O.V., Gildea, R.J., Howard, J.A.K., Puschmann, H. (2015). Acta Cryst. A71, 59-75.
3. Sheldrick, G.M. (2015). Acta Cryst. C71, 3-8.

## Crystal structure determination of **7**

**Crystal Data** for  $C_{30}H_{36}F_6N_5O_3PRuS$  ( $M=792.74$  g/mol): triclinic, space group P-1 (no. 2),  $a = 8.28700(10)$  Å,  $b = 8.48600(10)$  Å,  $c = 25.3050(5)$  Å,  $\alpha = 95.0620(10)^\circ$ ,  $\beta = 92.8540(10)^\circ$ ,  $\gamma = 97.4490(10)^\circ$ ,  $V = 1754.25(5)$  Å<sup>3</sup>,  $Z = 2$ ,  $T = 150.15$  K,  $\mu(\text{MoK}\alpha) = 0.622$  mm<sup>-1</sup>,  $D_{\text{calc}} = 1.501$  g/cm<sup>3</sup>, 29703 reflections measured ( $7.162^\circ \leq 2\theta \leq 55.304^\circ$ ), 7976 unique ( $R_{\text{int}} = 0.0668$ ,  $R_{\text{sigma}} = 0.0727$ ) which were used in all calculations. The final  $R_1$  was 0.0439 ( $I > 2\sigma(I)$ ) and  $wR_2$  was 0.0883 (all data).

## Refinement model description

Number of restraints - 69, number of constraints - unknown.

### Details:

1. Fixed Uiso  
At 1.2 times of:  
All C(H) groups, All C(H,H) groups  
At 1.5 times of:  
All C(H,H,H) groups
2. Restrained distances  
 $P1-F1 \approx P1-F2 \approx P1-F3A \approx P1-F4A \approx P1-F5A \approx P1-F6A \approx$   
 $P1-F3 \approx P1-F4 \approx P1-F5 \approx$   
 $P1-F6$   
with sigma of 0.02
3. Uiso/Uanis restraints and constraints  
 $U_{\text{anis}}(F3A) \approx U_{\text{eq}}$ ,  $U_{\text{anis}}(F4A) \approx U_{\text{eq}}$ ,  $U_{\text{anis}}(F5A) \approx U_{\text{eq}}$ ,  $U_{\text{anis}}(F6A) \approx U_{\text{eq}}$ : with sigma of 0.01 and sigma for terminal atoms of 0.02
4. Others  
Fixed Sof: F3(0.65) F4(0.65) F5(0.65) F6(0.65) F3A(0.35) F4A(0.35) F5A(0.35) F6A(0.35)
- 5.a Secondary CH2 refined with riding coordinates:  
C28(H28A,H28B), C29(H29A,H29B)
- 5.b Aromatic/amide H refined with riding coordinates:  
C9(H9), C10(H10), C11(H11), C12(H12), C15(H15), C17(H17), C18(H18), C21(H21), C22(H22), C24(H24), C25(H25)
- 5.c Idealised Me refined as rotating group:  
C2(H2A,H2B,H2C), C4(H4A,H4B,H4C), C6(H6A,H6B,H6C), C8(H8A,H8B,H8C), C26(H26A,H26B,H26C), C27(H27A,H27B,H27C), C30(H30A,H30B,H30C)

This report has been created with Olex2, compiled on 2016.02.19 svn.r3266 for OlexSys. Please [let us know](#) if there are any errors or if you would like to have additional features.

- 
- <sup>1</sup> (a) J.-P. Djukic, A. Berger, M. Duquenne, M. Pfeffer, A. de Cian and N. Kyritsakas-Gruber, *Organometallics*, 2004, **23**, 5757; (b) Y. Boutadla, O. Al-Duaij, D. L. Davies, G. A. Griffith and K. Singh, *Organometallics*, 2009, **28**, 433; (c) E. Ferrer-Flegeau, C. Bruneau, P. H. Dixneuf and A. Jutand, *J. Am. Chem. Soc.*, 2011, **133**, 10161.
- <sup>2</sup> (a) S. I. Kozhushkov, D. S. Yufit and L. Ackermann, *Org. Lett.*, 2008, **10**, 3409; (b) V. Bonnet, F. Mongin, F. Trécourt, G. Quéguiner and P. Knochel, *Tetrahedron*, 2002, **58**, 4429.
- <sup>3</sup> N. Hofmann and L. Ackermann, *J. Am. Chem. Soc.*, 2013, **135**, 5877.
- <sup>4</sup> L. A. Carpino, J. Xia, C. Zhang and A. El-Faham, *J. Org. Chem.*, 2004, **69**, 62.
- <sup>5</sup> D. R. Hicks and B. Fraser-Reid, *Synthesis*, 1974, 203.
